# Supplementary material for: Endogenous Syngap1 alpha splice forms promote cognitive function and seizure protection
Source: eLife. 2022 Apr 8;11:e75707. doi: 10.7554/eLife.75707 (PMC9064290; doi:10.7554/eLife.75707)
Supplement: Figure 7—source data 1. [file elife-75707-fig7-data1.xlsx]

## Sheet: Full List (Raw Data)
Raw Data (differentially expressesed proteins) after DLG4 IP from WT and Syngap1 PBM mice.
Gene Name	Accession	Isoform	Description	pvalue	Log2 FC
Gpm6a	P35802		Neuronal membrane glycoprotein M6-a OS=Mus musculus GN=Gpm6a PE=1 SV=1	0.00418915	-0.561606
Pkm	P52480		Pyruvate kinase PKM OS=Mus musculus GN=Pkm PE=1 SV=4	0.00496094	-1.0543
Pkm	P52480	2	Isoform M1 of Pyruvate kinase PKM OS=Mus musculus GN=Pkm	0.00501465	-1.05241
Fbxo41	Q6NS60		F-box only protein 41 OS=Mus musculus GN=Fbxo41 PE=1 SV=3	0.0121457	0.856597
#N/A	P18526		Ig heavy chain V region 345 OS=Mus musculus PE=1 SV=1	0.0122602	-0.371341
Iqsec2	Q5DU25		IQ motif and SEC7 domain-containing protein 2 OS=Mus musculus GN=Iqsec2 PE=1 SV=3	0.0160522	0.658213
Dpysl3	Q62188		Dihydropyrimidinase-related protein 3 OS=Mus musculus GN=Dpysl3 PE=1 SV=1	0.0175736	-0.491208
Nras	P08556		GTPase NRas OS=Mus musculus GN=Nras PE=1 SV=1	0.0189346	0.69309
Ywhae	P62259		14-3-3 protein epsilon OS=Mus musculus GN=Ywhae PE=1 SV=1	0.0198666	-0.514973
Igkc	P01837		Ig kappa chain C region OS=Mus musculus PE=1 SV=1	0.0224035	-0.957353
Dpysl2	O08553		Dihydropyrimidinase-related protein 2 OS=Mus musculus GN=Dpysl2 PE=1 SV=2	0.0272471	-0.343005
Shank3	Q4ACU6	2	Isoform 2 of SH3 and multiple ankyrin repeat domains protein 3 OS=Mus musculus GN=Shank3	0.0279396	0.674599
Shank3	Q4ACU6	6	Isoform 5 of SH3 and multiple ankyrin repeat domains protein 3 OS=Mus musculus GN=Shank3	0.029566	0.822065
Edil3	O35474		EGF-like repeat and discoidin I-like domain-containing protein 3 OS=Mus musculus GN=Edil3 PE=1 SV=2	0.030043	-0.745692
Igh-1a	P01865		Ig gamma-2A chain C region, membrane-bound form OS=Mus musculus GN=Igh-1a PE=1 SV=3	0.0351862	-0.455177
Ighg	P01863		Ig gamma-2A chain C region, A allele OS=Mus musculus GN=Ighg PE=1 SV=1	0.0351862	-0.455177
Dlgap3	Q6PFD5		Disks large-associated protein 3 OS=Mus musculus GN=Dlgap3 PE=1 SV=1	0.0374878	0.628443
Shank3	Q4ACU6		SH3 and multiple ankyrin repeat domains protein 3 OS=Mus musculus GN=Shank3 PE=1 SV=3	0.0394075	0.63829
Atp1a1	Q8VDN2		Sodium/potassium-transporting ATPase subunit alpha-1 OS=Mus musculus GN=Atp1a1 PE=1 SV=1	0.0405775	-0.218039
Shank3	Q4ACU6	3	Isoform 4 of SH3 and multiple ankyrin repeat domains protein 3 OS=Mus musculus GN=Shank3	0.0407194	0.660137
Agap3	Q8VHH5		Arf-GAP with GTPase, ANK repeat and PH domain-containing protein 3 OS=Mus musculus GN=Agap3 PE=1 SV=1	0.0410622	-0.222478
Agap3	Q8VHH5	2	Isoform 2 of Arf-GAP with GTPase, ANK repeat and PH domain-containing protein 3 OS=Mus musculus GN=Agap3	0.0410622	-0.222478
Ctnnd2	O35927		Catenin delta-2 OS=Mus musculus GN=Ctnnd2 PE=1 SV=1	0.0416561	0.607944
Ctnnd2	O35927	2	Isoform 2 of Catenin delta-2 OS=Mus musculus GN=Ctnnd2	0.0416561	0.607944
Iqsec1	Q8R0S2		IQ motif and SEC7 domain-containing protein 1 OS=Mus musculus GN=Iqsec1 PE=1 SV=2	0.0432114	0.56393
Iqsec1	Q8R0S2	2	Isoform 2 of IQ motif and SEC7 domain-containing protein 1 OS=Mus musculus GN=Iqsec1	0.0432114	0.56393
Shank3	Q4ACU6	8	Isoform 7 of SH3 and multiple ankyrin repeat domains protein 3 OS=Mus musculus GN=Shank3	0.0435244	0.635383
Shank3	Q4ACU6	9	Isoform 8 of SH3 and multiple ankyrin repeat domains protein 3 OS=Mus musculus GN=Shank3	0.0435244	0.635383
Shank3	Q4ACU6	10	Isoform 9 of SH3 and multiple ankyrin repeat domains protein 3 OS=Mus musculus GN=Shank3	0.0435244	0.635383
Shank3	Q4ACU6	11	Isoform 3 of SH3 and multiple ankyrin repeat domains protein 3 OS=Mus musculus GN=Shank3	0.0435244	0.635383
Shank3	Q4ACU6	7	Isoform 6 of SH3 and multiple ankyrin repeat domains protein 3 OS=Mus musculus GN=Shank3	0.0435244	0.635383
Shank3	Q4ACU6	12	Isoform 10 of SH3 and multiple ankyrin repeat domains protein 3 OS=Mus musculus GN=Shank3	0.0437882	0.63466
Atp5f1a	Q03265		ATP synthase subunit alpha, mitochondrial OS=Mus musculus GN=Atp5a1 PE=1 SV=1	0.0443589	-0.539667
Ddx5	Q61656		Probable ATP-dependent RNA helicase DDX5 OS=Mus musculus GN=Ddx5 PE=1 SV=2	0.0452176	0.230876
Shank1	D3YZU1		SH3 and multiple ankyrin repeat domains protein 1 OS=Mus musculus GN=Shank1 PE=1 SV=1	0.0495807	0.751002
Atp6v0a1	Q9Z1G4		V-type proton ATPase 116 kDa subunit a isoform 1 OS=Mus musculus GN=Atp6v0a1 PE=1 SV=3	0.0505517	-0.560097
Atp6v0a1	Q9Z1G4	2	Isoform A1-I of V-type proton ATPase 116 kDa subunit a isoform 1 OS=Mus musculus GN=Atp6v0a1	0.0505517	-0.560097
Atp6v0a1	Q9Z1G4	3	Isoform A1-III of V-type proton ATPase 116 kDa subunit a isoform 1 OS=Mus musculus GN=Atp6v0a1	0.0505517	-0.560097
Dlgap4	B1AZP2	2	Isoform 2 of Disks large-associated protein 4 OS=Mus musculus GN=Dlgap4	0.0517948	0.409179
Dlgap4	B1AZP2		Disks large-associated protein 4 OS=Mus musculus GN=Dlgap4 PE=1 SV=1	0.052899	0.40182
Vdac1	Q60932		Voltage-dependent anion-selective channel protein 1 OS=Mus musculus GN=Vdac1 PE=1 SV=3	0.0569459	-0.20029
Vdac1	Q60932	2	Isoform Mt-VDAC1 of Voltage-dependent anion-selective channel protein 1 OS=Mus musculus GN=Vdac1	0.0569459	-0.20029
Pgam5	Q8BX10		Serine/threonine-protein phosphatase PGAM5, mitochondrial OS=Mus musculus GN=Pgam5 PE=1 SV=1	0.057201	0.681082
Pgam5	Q8BX10	2	Isoform 2 of Serine/threonine-protein phosphatase PGAM5, mitochondrial OS=Mus musculus GN=Pgam5	0.057201	0.681082
Atp5f1b	P56480		ATP synthase subunit beta, mitochondrial OS=Mus musculus GN=Atp5b PE=1 SV=2	0.0572401	-1.27102
Ap2a2	P17427		AP-2 complex subunit alpha-2 OS=Mus musculus GN=Ap2a2 PE=1 SV=2	0.0608603	-0.29173
#N/A	P01864		Ig gamma-2A chain C region secreted form OS=Mus musculus PE=1 SV=1	0.0615434	-0.516606
Mapt	P10637		Microtubule-associated protein tau OS=Mus musculus GN=Mapt PE=1 SV=3	0.0615464	-0.784596
Mapt	P10637	4	Isoform Tau-C of Microtubule-associated protein tau OS=Mus musculus GN=Mapt	0.0615464	-0.784596
Mapt	P10637	6	Isoform Tau-E of Microtubule-associated protein tau OS=Mus musculus GN=Mapt	0.0615464	-0.784596
Mapt	P10637	3	Isoform Tau-B of Microtubule-associated protein tau OS=Mus musculus GN=Mapt	0.0615464	-0.784596
Mapt	P10637	2	Isoform Tau-A of Microtubule-associated protein tau OS=Mus musculus GN=Mapt	0.0615464	-0.784596
Mapt	P10637	5	Isoform Tau-D of Microtubule-associated protein tau OS=Mus musculus GN=Mapt	0.0615464	-0.784596
#N/A	P84751		Ig heavy chain Mem5 (Fragment) OS=Mus musculus PE=1 SV=1	0.0688091	-0.310026
Acot7	Q91V12	3	Isoform C of Cytosolic acyl coenzyme A thioester hydrolase OS=Mus musculus GN=Acot7	0.0728146	-0.911921
Dlgap1	Q9D415		Disks large-associated protein 1 OS=Mus musculus GN=Dlgap1 PE=1 SV=3	0.075018	0.336528
Dlgap1	Q9D415	3	Isoform 3 of Disks large-associated protein 1 OS=Mus musculus GN=Dlgap1	0.075018	0.336528
Cdc42	P60766		Cell division control protein 42 homolog OS=Mus musculus GN=Cdc42 PE=1 SV=2	0.0762815	1.23585
Shank2	Q80Z38	2	Isoform 2 of SH3 and multiple ankyrin repeat domains protein 2 OS=Mus musculus GN=Shank2	0.077589	0.499772
Shank2	Q80Z38		SH3 and multiple ankyrin repeat domains protein 2 OS=Mus musculus GN=Shank2 PE=1 SV=2	0.077589	0.499772
Shank2	Q80Z38	3	Isoform 3 of SH3 and multiple ankyrin repeat domains protein 2 OS=Mus musculus GN=Shank2	0.077589	0.499772
Srcin1	Q9QWI6		SRC kinase signaling inhibitor 1 OS=Mus musculus GN=Srcin1 PE=1 SV=2	0.0781339	0.875723
Srcin1	Q9QWI6	3	Isoform 3 of SRC kinase signaling inhibitor 1 OS=Mus musculus GN=Srcin1	0.0781339	0.875723
Srcin1	Q9QWI6	2	Isoform 2 of SRC kinase signaling inhibitor 1 OS=Mus musculus GN=Srcin1	0.0781339	0.875723
Atp1a4	Q9WV27		Sodium/potassium-transporting ATPase subunit alpha-4 OS=Mus musculus GN=Atp1a4 PE=1 SV=3	0.0809654	-0.198441
Kras	P32883	2	Isoform 2B of GTPase KRas OS=Mus musculus GN=Kras	0.0824076	0.64624
Kras	P32883		GTPase KRas OS=Mus musculus GN=Kras PE=1 SV=1	0.0824076	0.64624
Syt1	P46096		Synaptotagmin-1 OS=Mus musculus GN=Syt1 PE=1 SV=1	0.0828917	-0.731478
Stxbp1	O08599	2	Isoform 2 of Syntaxin-binding protein 1 OS=Mus musculus GN=Stxbp1	0.0872586	-0.180853
Stxbp1	O08599		Syntaxin-binding protein 1 OS=Mus musculus GN=Stxbp1 PE=1 SV=2	0.0872586	-0.180853
Hspd1	P63038	2	Isoform 2 of 60 kDa heat shock protein, mitochondrial OS=Mus musculus GN=Hspd1	0.0913293	-0.777253
Hspd1	P63038		60 kDa heat shock protein, mitochondrial OS=Mus musculus GN=Hspd1 PE=1 SV=1	0.0916842	-0.799656
Slc4a4	O88343		Electrogenic sodium bicarbonate cotransporter 1 OS=Mus musculus GN=Slc4a4 PE=1 SV=2	0.0925602	0.673331
Slc4a4	O88343	2	Isoform 2 of Electrogenic sodium bicarbonate cotransporter 1 OS=Mus musculus GN=Slc4a4	0.0925602	0.673331
Ablim1	Q8K4G5	3	Isoform 3 of Actin-binding LIM protein 1 OS=Mus musculus GN=Ablim1	0.0928989	0.583093
Ablim1	Q8K4G5	2	Isoform 2 of Actin-binding LIM protein 1 OS=Mus musculus GN=Ablim1	0.0942654	0.584172
Ablim1	Q8K4G5		Actin-binding LIM protein 1 OS=Mus musculus GN=Ablim1 PE=1 SV=1	0.0942654	0.584172
Ablim1	Q8K4G5	4	Isoform 4 of Actin-binding LIM protein 1 OS=Mus musculus GN=Ablim1	0.0942654	0.584172
Atp5pb	Q9CQQ7		ATP synthase F(0) complex subunit B1, mitochondrial OS=Mus musculus GN=Atp5f1 PE=1 SV=1	0.0972004	-0.78743
Tubb4a	Q9D6F9		Tubulin beta-4A chain OS=Mus musculus GN=Tubb4a PE=1 SV=3	0.100466	-0.498407
Cyfip2	Q5SQX6		Cytoplasmic FMR1-interacting protein 2 OS=Mus musculus GN=Cyfip2 PE=1 SV=2	0.100534	1.2431
Adgrb3	Q80ZF8		Adhesion G protein-coupled receptor B3 OS=Mus musculus GN=Adgrb3 PE=1 SV=2	0.101392	0.391412
Atp6v1a	P50516	2	Isoform 2 of V-type proton ATPase catalytic subunit A OS=Mus musculus GN=Atp6v1a	0.103533	-0.153599
Atp6v1a	P50516		V-type proton ATPase catalytic subunit A OS=Mus musculus GN=Atp6v1a PE=1 SV=2	0.103533	-0.153599
Homer1	Q9Z2Y3	3	Isoform 3 of Homer protein homolog 1 OS=Mus musculus GN=Homer1	0.103982	0.626748
Homer1	Q9Z2Y3	4	Isoform 4 of Homer protein homolog 1 OS=Mus musculus GN=Homer1	0.103982	0.626748
Homer1	Q9Z2Y3		Homer protein homolog 1 OS=Mus musculus GN=Homer1 PE=1 SV=2	0.103982	0.626748
Homer1	Q9Z2Y3	5	Isoform 5 of Homer protein homolog 1 OS=Mus musculus GN=Homer1	0.103982	0.626748
Homer1	Q9Z2Y3	2	Isoform 2 of Homer protein homolog 1 OS=Mus musculus GN=Homer1	0.103982	0.626748
Baiap2	Q8BKX1		Brain-specific angiogenesis inhibitor 1-associated protein 2 OS=Mus musculus GN=Baiap2 PE=1 SV=2	0.105376	-0.473034
Baiap2	Q8BKX1	4	Isoform 4 of Brain-specific angiogenesis inhibitor 1-associated protein 2 OS=Mus musculus GN=Baiap2	0.105376	-0.473034
Baiap2	Q8BKX1	3	Isoform 3 of Brain-specific angiogenesis inhibitor 1-associated protein 2 OS=Mus musculus GN=Baiap2	0.105376	-0.473034
Baiap2	Q8BKX1	2	Isoform 2 of Brain-specific angiogenesis inhibitor 1-associated protein 2 OS=Mus musculus GN=Baiap2	0.105376	-0.473034
Gap43	P06837		Neuromodulin OS=Mus musculus GN=Gap43 PE=1 SV=1	0.105729	-0.399793
Ablim1	Q8K4G5	5	Isoform 5 of Actin-binding LIM protein 1 OS=Mus musculus GN=Ablim1	0.111419	0.581236
Hras	Q61411		GTPase HRas OS=Mus musculus GN=Hras PE=1 SV=2	0.114722	0.932768
Hras	Q61411	2	Isoform 2 of GTPase HRas OS=Mus musculus GN=Hras	0.114722	0.932768
Atp12a	Q9Z1W8		Potassium-transporting ATPase alpha chain 2 OS=Mus musculus GN=Atp12a PE=1 SV=3	0.119253	-0.149209
Camk2d	Q6PHZ2	5	Isoform 4 of Calcium/calmodulin-dependent protein kinase type II subunit delta OS=Mus musculus GN=Camk2d	0.121308	-0.343598
Camk2d	Q6PHZ2	4	Isoform 3 of Calcium/calmodulin-dependent protein kinase type II subunit delta OS=Mus musculus GN=Camk2d	0.121308	-0.343598
Camk2d	Q6PHZ2	2	Isoform 2 of Calcium/calmodulin-dependent protein kinase type II subunit delta OS=Mus musculus GN=Camk2d	0.121308	-0.343598
Camk2d	Q6PHZ2		Calcium/calmodulin-dependent protein kinase type II subunit delta OS=Mus musculus GN=Camk2d PE=1 SV=1	0.121308	-0.343598
Nsf	P46460		Vesicle-fusing ATPase OS=Mus musculus GN=Nsf PE=1 SV=2	0.122213	0.208191
Atp1a3	Q6PIC6		Sodium/potassium-transporting ATPase subunit alpha-3 OS=Mus musculus GN=Atp1a3 PE=1 SV=1	0.123673	-0.194993
Tubb4b	P68372		Tubulin beta-4B chain OS=Mus musculus GN=Tubb4b PE=1 SV=1	0.124439	-0.511076
Hecw1	Q8K4P8		E3 ubiquitin-protein ligase HECW1 OS=Mus musculus GN=Hecw1 PE=1 SV=3	0.127315	0.84006
Cdc42	P60766	1	Isoform 1 of Cell division control protein 42 homolog OS=Mus musculus GN=Cdc42	0.1277	0.607162
Sfxn3	Q91V61	2	Isoform 2 of Sideroflexin-3 OS=Mus musculus GN=Sfxn3	0.13345	-0.31917
Sfxn3	Q91V61		Sideroflexin-3 OS=Mus musculus GN=Sfxn3 PE=1 SV=1	0.13345	-0.31917
Rac3	P60764		Ras-related C3 botulinum toxin substrate 3 OS=Mus musculus GN=Rac3 PE=1 SV=1	0.134103	0.859991
Phb	P67778		Prohibitin OS=Mus musculus GN=Phb PE=1 SV=1	0.146091	-0.30308
Rac1	P63001		Ras-related C3 botulinum toxin substrate 1 OS=Mus musculus GN=Rac1 PE=1 SV=1	0.146648	0.810802
Rac2	Q05144		Ras-related C3 botulinum toxin substrate 2 OS=Mus musculus GN=Rac2 PE=1 SV=1	0.147191	0.761061
Dlgap2	Q8BJ42	2	Isoform 2 of Disks large-associated protein 2 OS=Mus musculus GN=Dlgap2	0.14759	0.282541
Erbin	Q80TH2	1	Isoform 1 of Erbin OS=Mus musculus GN=Erbin	0.148842	0.264405
Erbin	Q80TH2	2	Isoform 2 of Erbin OS=Mus musculus GN=Erbin	0.148842	0.264405
Erbin	Q80TH2		Erbin OS=Mus musculus GN=Erbin PE=1 SV=3	0.148842	0.264405
Atp2b4	Q6Q477	2	Isoform 2 of Plasma membrane calcium-transporting ATPase 4 OS=Mus musculus GN=Atp2b4	0.151692	0.254719
Atp2b4	Q6Q477		Plasma membrane calcium-transporting ATPase 4 OS=Mus musculus GN=Atp2b4 PE=1 SV=1	0.151692	0.254719
Grin2d	Q03391		Glutamate receptor ionotropic, NMDA 2D OS=Mus musculus GN=Grin2d PE=1 SV=3	0.151788	0.410144
Dlgap2	Q8BJ42		Disks large-associated protein 2 OS=Mus musculus GN=Dlgap2 PE=1 SV=2	0.155441	0.277651
Dlgap4	B1AZP2	3	Isoform 3 of Disks large-associated protein 4 OS=Mus musculus GN=Dlgap4	0.156448	0.337393
Ppp3ca	P63328		Serine/threonine-protein phosphatase 2B catalytic subunit alpha isoform OS=Mus musculus GN=Ppp3ca PE=1 SV=1	0.159546	-0.591804
Ppp3ca	P63328	2	Isoform 2 of Serine/threonine-protein phosphatase 2B catalytic subunit alpha isoform OS=Mus musculus GN=Ppp3ca	0.159546	-0.591804
Uqcrc2	Q9DB77		Cytochrome b-c1 complex subunit 2, mitochondrial OS=Mus musculus GN=Uqcrc2 PE=1 SV=1	0.164527	-0.210423
Krt6b	Q9Z331		Keratin, type II cytoskeletal 6B OS=Mus musculus GN=Krt6b PE=1 SV=3	0.165214	-0.674831
Pcbp2	Q61990		Poly(rC)-binding protein 2 OS=Mus musculus GN=Pcbp2 PE=1 SV=1	0.166305	0.494942
Pcbp3	P57722	2	Isoform 2 of Poly(rC)-binding protein 3 OS=Mus musculus GN=Pcbp3	0.166305	0.494942
Pcbp3	P57722		Poly(rC)-binding protein 3 OS=Mus musculus GN=Pcbp3 PE=1 SV=3	0.166305	0.494942
Pcbp2	Q61990	3	Isoform 3 of Poly(rC)-binding protein 2 OS=Mus musculus GN=Pcbp2	0.166305	0.494942
Pcbp2	Q61990	2	Isoform 2 of Poly(rC)-binding protein 2 OS=Mus musculus GN=Pcbp2	0.166305	0.494942
Adgrb2	Q8CGM1	2	Isoform 2 of Adhesion G protein-coupled receptor B2 OS=Mus musculus GN=Adgrb2	0.166593	0.424221
Adgrb2	Q8CGM1		Adhesion G protein-coupled receptor B2 OS=Mus musculus GN=Adgrb2 PE=1 SV=2	0.166593	0.424221
Adgrb2	Q8CGM1	3	Isoform 3 of Adhesion G protein-coupled receptor B2 OS=Mus musculus GN=Adgrb2	0.166593	0.424221
Ap2m1	P84091		AP-2 complex subunit mu OS=Mus musculus GN=Ap2m1 PE=1 SV=1	0.167332	0.479144
Park7	Q99LX0		Protein DJ-1 OS=Mus musculus GN=Park7 PE=1 SV=1	0.169584	-0.338836
Prkcg	P63318		Protein kinase C gamma type OS=Mus musculus GN=Prkcg PE=1 SV=1	0.173579	0.313051
Crmp1	P97427		Dihydropyrimidinase-related protein 1 OS=Mus musculus GN=Crmp1 PE=1 SV=1	0.175142	-0.207629
Syngap1	F6SEU4		Ras/Rap GTPase-activating protein SynGAP OS=Mus musculus GN=Syngap1 PE=1 SV=2	0.175547	-0.483266
Lgi1	Q9JIA1		Leucine-rich glioma-inactivated protein 1 OS=Mus musculus GN=Lgi1 PE=1 SV=1	0.177571	-0.443897
Slc3a2	P10852	2	Isoform 2 of 4F2 cell-surface antigen heavy chain OS=Mus musculus GN=Slc3a2	0.178535	-0.555614
Slc3a2	P10852		4F2 cell-surface antigen heavy chain OS=Mus musculus GN=Slc3a2 PE=1 SV=1	0.178535	-0.555614
Eno2	P17183		Gamma-enolase OS=Mus musculus GN=Eno2 PE=1 SV=2	0.179532	-0.922992
Acot7	Q91V12	2	Isoform A of Cytosolic acyl coenzyme A thioester hydrolase OS=Mus musculus GN=Acot7	0.181075	-0.436419
Acot7	Q91V12		Cytosolic acyl coenzyme A thioester hydrolase OS=Mus musculus GN=Acot7 PE=1 SV=2	0.181075	-0.436419
Acot7	Q91V12	4	Isoform D of Cytosolic acyl coenzyme A thioester hydrolase OS=Mus musculus GN=Acot7	0.181075	-0.436419
Gria1	P23818		Glutamate receptor 1 OS=Mus musculus GN=Gria1 PE=1 SV=1	0.181727	-0.523617
Add1	Q9QYC0		Alpha-adducin OS=Mus musculus GN=Add1 PE=1 SV=2	0.186038	-0.0852078
Add1	Q9QYC0	2	Isoform 2 of Alpha-adducin OS=Mus musculus GN=Add1	0.186038	-0.0852078
Hist1h2bh	Q64478		Histone H2B type 1-H OS=Mus musculus GN=Hist1h2bh PE=1 SV=3	0.187341	-0.946448
Hist1h2bb	Q64475		Histone H2B type 1-B OS=Mus musculus GN=Hist1h2bb PE=1 SV=3	0.187341	-0.946448
Hist1h2bm	P10854		Histone H2B type 1-M OS=Mus musculus GN=Hist1h2bm PE=1 SV=2	0.187341	-0.946448
Hist3h2bb	Q8CGP0		Histone H2B type 3-B OS=Mus musculus GN=Hist3h2bb PE=1 SV=3	0.187341	-0.946448
Hist1h2bf	P10853		Histone H2B type 1-F/J/L OS=Mus musculus GN=Hist1h2bf PE=1 SV=2	0.187341	-0.946448
Hist1h2bp	Q8CGP2		Histone H2B type 1-P OS=Mus musculus GN=Hist1h2bp PE=1 SV=3	0.187341	-0.946448
Hist2h2be	Q64524		Histone H2B type 2-E OS=Mus musculus GN=Hist2h2be PE=1 SV=3	0.187341	-0.946448
H2bc4	Q6ZWY9		Histone H2B type 1-C/E/G OS=Mus musculus GN=Hist1h2bc PE=1 SV=3	0.187341	-0.946448
Hist2h2bb	Q64525		Histone H2B type 2-B OS=Mus musculus GN=Hist2h2bb PE=1 SV=3	0.187341	-0.946448
Hist3h2ba	Q9D2U9		Histone H2B type 3-A OS=Mus musculus GN=Hist3h2ba PE=1 SV=3	0.187341	-0.946448
Hist1h2bp	Q8CGP2	2	Isoform 2 of Histone H2B type 1-P OS=Mus musculus GN=Hist1h2bp	0.187341	-0.946448
Hist1h2bk	Q8CGP1		Histone H2B type 1-K OS=Mus musculus GN=Hist1h2bk PE=1 SV=3	0.187341	-0.946448
Hnrnpa2b1	O88569	3	Isoform 3 of Heterogeneous nuclear ribonucleoproteins A2/B1 OS=Mus musculus GN=Hnrnpa2b1	0.188795	-0.969616
Hnrnpa2b1	O88569		Heterogeneous nuclear ribonucleoproteins A2/B1 OS=Mus musculus GN=Hnrnpa2b1 PE=1 SV=2	0.188795	-0.969616
Hnrnpa2b1	O88569	2	Isoform 2 of Heterogeneous nuclear ribonucleoproteins A2/B1 OS=Mus musculus GN=Hnrnpa2b1	0.188795	-0.969616
Atp1b1	P14094		Sodium/potassium-transporting ATPase subunit beta-1 OS=Mus musculus GN=Atp1b1 PE=1 SV=1	0.199055	-0.160964
Ywhag	P61982		14-3-3 protein gamma OS=Mus musculus GN=Ywhag PE=1 SV=2	0.199074	-0.271155
Rrbp1	Q99PL5	10	Isoform RRp2 of Ribosome-binding protein 1 OS=Mus musculus GN=Rrbp1	0.205634	0.932947
Rrbp1	Q99PL5	9	Isoform RRp5.4 of Ribosome-binding protein 1 OS=Mus musculus GN=Rrbp1	0.205634	0.932947
Rrbp1	Q99PL5	12	Isoform RRp0 of Ribosome-binding protein 1 OS=Mus musculus GN=Rrbp1	0.205634	0.932947
Rrbp1	Q99PL5	11	Isoform RRp1.8 of Ribosome-binding protein 1 OS=Mus musculus GN=Rrbp1	0.205634	0.932947
Fam81a	Q3UXZ6		Protein FAM81A OS=Mus musculus GN=Fam81a PE=1 SV=2	0.205856	-0.135307
Lrrtm1	Q8K377		Leucine-rich repeat transmembrane neuronal protein 1 OS=Mus musculus GN=Lrrtm1 PE=2 SV=1	0.207123	-0.382023
Acta2	P62737		Actin, aortic smooth muscle OS=Mus musculus GN=Acta2 PE=1 SV=1	0.20794	0.302202
Acta1	P68134		Actin, alpha skeletal muscle OS=Mus musculus GN=Acta1 PE=1 SV=1	0.20794	0.302202
Actc1	P68033		Actin, alpha cardiac muscle 1 OS=Mus musculus GN=Actc1 PE=1 SV=1	0.20794	0.302202
Actg2	P63268		Actin, gamma-enteric smooth muscle OS=Mus musculus GN=Actg2 PE=1 SV=1	0.20794	0.302202
Rps11	P62281		40S ribosomal protein S11 OS=Mus musculus GN=Rps11 PE=1 SV=3	0.208791	0.993638
Camk2a	P11798		Calcium/calmodulin-dependent protein kinase type II subunit alpha OS=Mus musculus GN=Camk2a PE=1 SV=2	0.209859	-0.289279
Rrbp1	Q99PL5	6	Isoform RRp15a of Ribosome-binding protein 1 OS=Mus musculus GN=Rrbp1	0.210286	1.01651
Rrbp1	Q99PL5	7	Isoform RRp15b of Ribosome-binding protein 1 OS=Mus musculus GN=Rrbp1	0.210286	1.01651
Rrbp1	Q99PL5	5	Isoform RRp16.8 of Ribosome-binding protein 1 OS=Mus musculus GN=Rrbp1	0.210286	1.01651
Rrbp1	Q99PL5	4	Isoform RRp41 of Ribosome-binding protein 1 OS=Mus musculus GN=Rrbp1	0.210286	1.01651
Rrbp1	Q99PL5	3	Isoform RRp47 of Ribosome-binding protein 1 OS=Mus musculus GN=Rrbp1	0.210286	1.01651
Rrbp1	Q99PL5	2	Isoform RRp61 of Ribosome-binding protein 1 OS=Mus musculus GN=Rrbp1	0.210286	1.01651
Rrbp1	Q99PL5	8	Isoform RRp10 of Ribosome-binding protein 1 OS=Mus musculus GN=Rrbp1	0.210286	1.01651
Grn	P28798		Granulins OS=Mus musculus GN=Grn PE=1 SV=2	0.210484	-0.313102
Adam22	Q9R1V6	16	Isoform 14 of Disintegrin and metalloproteinase domain-containing protein 22 OS=Mus musculus GN=Adam22	0.214676	-0.582911
Adam22	Q9R1V6	21	Isoform 21 of Disintegrin and metalloproteinase domain-containing protein 22 OS=Mus musculus GN=Adam22	0.214676	-0.582911
Adam22	Q9R1V6	18	Isoform 16 of Disintegrin and metalloproteinase domain-containing protein 22 OS=Mus musculus GN=Adam22	0.214676	-0.582911
Adam22	Q9R1V6	19	Isoform 18 of Disintegrin and metalloproteinase domain-containing protein 22 OS=Mus musculus GN=Adam22	0.215128	-0.582553
Adam22	Q9R1V6	2	Isoform 17 of Disintegrin and metalloproteinase domain-containing protein 22 OS=Mus musculus GN=Adam22	0.215128	-0.582553
Phb2	O35129		Prohibitin-2 OS=Mus musculus GN=Phb2 PE=1 SV=1	0.215303	-0.195799
Adam22	Q9R1V6	9	Isoform 7 of Disintegrin and metalloproteinase domain-containing protein 22 OS=Mus musculus GN=Adam22	0.218135	-0.578381
Adam22	Q9R1V6	1	Isoform 20 of Disintegrin and metalloproteinase domain-containing protein 22 OS=Mus musculus GN=Adam22	0.218135	-0.578381
Adam22	Q9R1V6	20	Isoform 19 of Disintegrin and metalloproteinase domain-containing protein 22 OS=Mus musculus GN=Adam22	0.218135	-0.578381
Tubb2a	Q7TMM9		Tubulin beta-2A chain OS=Mus musculus GN=Tubb2a PE=1 SV=1	0.218485	-0.505662
Alb	P07724		Serum albumin OS=Mus musculus GN=Alb PE=1 SV=3	0.218543	-0.622948
Shisa7	Q8C3Q5		Protein shisa-7 OS=Mus musculus GN=Shisa7 PE=1 SV=3	0.219778	-0.194389
Shisa7	Q8C3Q5	2	Isoform 2 of Protein shisa-7 OS=Mus musculus GN=Shisa7	0.219778	-0.194389
Atp2b2	Q9R0K7		Plasma membrane calcium-transporting ATPase 2 OS=Mus musculus GN=Atp2b2 PE=1 SV=2	0.219981	0.29206
Prkar2b	P31324		cAMP-dependent protein kinase type II-beta regulatory subunit OS=Mus musculus GN=Prkar2b PE=1 SV=3	0.222071	-0.345783
Prkacb	P68181	3	Isoform 3 of cAMP-dependent protein kinase catalytic subunit beta OS=Mus musculus GN=Prkacb	0.226577	0.257392
Prkacb	P68181	2	Isoform 2 of cAMP-dependent protein kinase catalytic subunit beta OS=Mus musculus GN=Prkacb	0.226577	0.257392
Prkacb	P68181	4	Isoform 4 of cAMP-dependent protein kinase catalytic subunit beta OS=Mus musculus GN=Prkacb	0.226577	0.257392
Prkacb	P68181		cAMP-dependent protein kinase catalytic subunit beta OS=Mus musculus GN=Prkacb PE=1 SV=2	0.226577	0.257392
Prkaca	P05132	2	Isoform 2 of cAMP-dependent protein kinase catalytic subunit alpha OS=Mus musculus GN=Prkaca	0.226577	0.257392
Prkaca	P05132		cAMP-dependent protein kinase catalytic subunit alpha OS=Mus musculus GN=Prkaca PE=1 SV=3	0.226577	0.257392
Adam22	Q9R1V6	6	Isoform 4 of Disintegrin and metalloproteinase domain-containing protein 22 OS=Mus musculus GN=Adam22	0.227048	-0.56034
Adam22	Q9R1V6	7	Isoform 5 of Disintegrin and metalloproteinase domain-containing protein 22 OS=Mus musculus GN=Adam22	0.227048	-0.56034
Adam22	Q9R1V6	4	Isoform 2 of Disintegrin and metalloproteinase domain-containing protein 22 OS=Mus musculus GN=Adam22	0.227048	-0.56034
Adam22	Q9R1V6	10	Isoform 8 of Disintegrin and metalloproteinase domain-containing protein 22 OS=Mus musculus GN=Adam22	0.227048	-0.56034
Adam22	Q9R1V6	5	Isoform 3 of Disintegrin and metalloproteinase domain-containing protein 22 OS=Mus musculus GN=Adam22	0.227048	-0.56034
Adam22	Q9R1V6	17	Isoform 15 of Disintegrin and metalloproteinase domain-containing protein 22 OS=Mus musculus GN=Adam22	0.227048	-0.56034
Adam22	Q9R1V6	14	Isoform 12 of Disintegrin and metalloproteinase domain-containing protein 22 OS=Mus musculus GN=Adam22	0.229189	-0.557799
Adam22	Q9R1V6	11	Isoform 9 of Disintegrin and metalloproteinase domain-containing protein 22 OS=Mus musculus GN=Adam22	0.229189	-0.557799
Adam22	Q9R1V6	13	Isoform 11 of Disintegrin and metalloproteinase domain-containing protein 22 OS=Mus musculus GN=Adam22	0.229544	-0.557274
Adam22	Q9R1V6	12	Isoform 10 of Disintegrin and metalloproteinase domain-containing protein 22 OS=Mus musculus GN=Adam22	0.229544	-0.557274
Adam22	Q9R1V6	15	Isoform 13 of Disintegrin and metalloproteinase domain-containing protein 22 OS=Mus musculus GN=Adam22	0.229544	-0.557274
Adam22	Q9R1V6	8	Isoform 6 of Disintegrin and metalloproteinase domain-containing protein 22 OS=Mus musculus GN=Adam22	0.229544	-0.557274
Adam22	Q9R1V6		Disintegrin and metalloproteinase domain-containing protein 22 OS=Mus musculus GN=Adam22 PE=1 SV=2	0.229544	-0.557274
Grin2a	P35436		Glutamate receptor ionotropic, NMDA 2A OS=Mus musculus GN=Grin2a PE=1 SV=2	0.229584	0.188808
Actb	P60710		Actin, cytoplasmic 1 OS=Mus musculus GN=Actb PE=1 SV=1	0.23418	0.276158
Actg1	P63260		Actin, cytoplasmic 2 OS=Mus musculus GN=Actg1 PE=1 SV=1	0.23418	0.276158
Tubb5	P99024		Tubulin beta-5 chain OS=Mus musculus GN=Tubb5 PE=1 SV=1	0.234677	-0.51369
Krt6a	P50446		Keratin, type II cytoskeletal 6A OS=Mus musculus GN=Krt6a PE=1 SV=3	0.234963	-0.544679
Sdha	Q8K2B3		Succinate dehydrogenase [ubiquinone] flavoprotein subunit, mitochondrial OS=Mus musculus GN=Sdha PE=1 SV=1	0.239083	-0.299928
Dclk1	Q9JLM8	2	Isoform 2 of Serine/threonine-protein kinase DCLK1 OS=Mus musculus GN=Dclk1	0.239474	0.273414
Dclk1	Q9JLM8		Serine/threonine-protein kinase DCLK1 OS=Mus musculus GN=Dclk1 PE=1 SV=1	0.239474	0.273414
Gnb2	P62880		Guanine nucleotide-binding protein G(I)/G(S)/G(T) subunit beta-2 OS=Mus musculus GN=Gnb2 PE=1 SV=3	0.244428	-0.405974
Gnb4	P29387		Guanine nucleotide-binding protein subunit beta-4 OS=Mus musculus GN=Gnb4 PE=1 SV=4	0.244428	-0.405974
Ap1b1	O35643		AP-1 complex subunit beta-1 OS=Mus musculus GN=Ap1b1 PE=1 SV=2	0.253558	-0.186063
Lrrc7	Q80TE7		Leucine-rich repeat-containing protein 7 OS=Mus musculus GN=Lrrc7 PE=1 SV=2	0.254265	0.255177
Rrbp1	Q99PL5		Ribosome-binding protein 1 OS=Mus musculus GN=Rrbp1 PE=1 SV=2	0.26043	0.878305
Mapk3	Q63844		Mitogen-activated protein kinase 3 OS=Mus musculus GN=Mapk3 PE=1 SV=5	0.261553	-0.145161
Cacng2	O88602		Voltage-dependent calcium channel gamma-2 subunit OS=Mus musculus GN=Cacng2 PE=1 SV=1	0.262877	-0.417703
Camk2a	P11798	2	Isoform Alpha KAP of Calcium/calmodulin-dependent protein kinase type II subunit alpha OS=Mus musculus GN=Camk2a	0.266605	-0.249816
Actbl2	Q8BFZ3		Beta-actin-like protein 2 OS=Mus musculus GN=Actbl2 PE=1 SV=1	0.272519	0.292299
Dlgap1	Q9D415	5	Isoform 5 of Disks large-associated protein 1 OS=Mus musculus GN=Dlgap1	0.275407	0.208912
Ldhc	P00342		L-lactate dehydrogenase C chain OS=Mus musculus GN=Ldhc PE=1 SV=2	0.276316	-0.178298
Ncam1	P13595		Neural cell adhesion molecule 1 OS=Mus musculus GN=Ncam1 PE=1 SV=3	0.279263	-0.247654
Ncam1	P13595	2	Isoform 2 of Neural cell adhesion molecule 1 OS=Mus musculus GN=Ncam1	0.279263	-0.247654
Syn2	Q64332		Synapsin-2 OS=Mus musculus GN=Syn2 PE=1 SV=2	0.288933	0.286777
Plxna4	Q80UG2		Plexin-A4 OS=Mus musculus GN=Plxna4 PE=1 SV=3	0.290197	-0.0781865
Dhx9	O70133		ATP-dependent RNA helicase A OS=Mus musculus GN=Dhx9 PE=1 SV=2	0.290547	0.358583
Dhx9	O70133	2	Isoform 2 of ATP-dependent RNA helicase A OS=Mus musculus GN=Dhx9	0.290547	0.358583
Slc25a3	Q8VEM8		Phosphate carrier protein, mitochondrial OS=Mus musculus GN=Slc25a3 PE=1 SV=1	0.293266	0.20431
Rab7a	P51150		Ras-related protein Rab-7a OS=Mus musculus GN=Rab7a PE=1 SV=2	0.293701	-0.44724
Gria2	P23819	3	Isoform 3 of Glutamate receptor 2 OS=Mus musculus GN=Gria2	0.300844	-0.279615
Gria2	P23819	4	Isoform 4 of Glutamate receptor 2 OS=Mus musculus GN=Gria2	0.300844	-0.279615
Krt16	Q9Z2K1		Keratin, type I cytoskeletal 16 OS=Mus musculus GN=Krt16 PE=1 SV=3	0.301226	-0.363141
Gria3	Q9Z2W9		Glutamate receptor 3 OS=Mus musculus GN=Gria3 PE=1 SV=2	0.30382	-0.426819
Homer3	Q99JP6	2	Isoform 2 of Homer protein homolog 3 OS=Mus musculus GN=Homer3	0.30404	0.665865
Homer2	Q9QWW1	2	Isoform 2 of Homer protein homolog 2 OS=Mus musculus GN=Homer2	0.30404	0.665865
Homer2	Q9QWW1		Homer protein homolog 2 OS=Mus musculus GN=Homer2 PE=1 SV=1	0.30404	0.665865
Homer3	Q99JP6		Homer protein homolog 3 OS=Mus musculus GN=Homer3 PE=1 SV=2	0.30404	0.665865
Grin2b	Q01097		Glutamate receptor ionotropic, NMDA 2B OS=Mus musculus GN=Grin2b PE=1 SV=3	0.306478	0.181968
Ywhab	Q9CQV8		14-3-3 protein beta/alpha OS=Mus musculus GN=Ywhab PE=1 SV=3	0.307662	-0.264224
Ywhab	Q9CQV8	2	Isoform Short of 14-3-3 protein beta/alpha OS=Mus musculus GN=Ywhab	0.307662	-0.264224
Gda	Q9R111		Guanine deaminase OS=Mus musculus GN=Gda PE=1 SV=1	0.307778	-1.26898
Htra1	Q9R118		Serine protease HTRA1 OS=Mus musculus GN=Htra1 PE=1 SV=2	0.312091	-0.213658
Tubb2b	Q9CWF2		Tubulin beta-2B chain OS=Mus musculus GN=Tubb2b PE=1 SV=1	0.312738	-0.592822
Rab3a	P63011		Ras-related protein Rab-3A OS=Mus musculus GN=Rab3a PE=1 SV=1	0.314057	-0.794551
Ncam1	P13595	4	Isoform 4 of Neural cell adhesion molecule 1 OS=Mus musculus GN=Ncam1	0.318418	-0.306554
Flot1	O08917		Flotillin-1 OS=Mus musculus GN=Flot1 PE=1 SV=1	0.321963	0.278098
Dlgap1	Q9D415	4	Isoform 4 of Disks large-associated protein 1 OS=Mus musculus GN=Dlgap1	0.322287	0.193198
Tubb1	A2AQ07		Tubulin beta-1 chain OS=Mus musculus GN=Tubb1 PE=1 SV=1	0.322806	-0.461158
Sucla2	Q9Z2I9		Succinate--CoA ligase [ADP-forming] subunit beta, mitochondrial OS=Mus musculus GN=Sucla2 PE=1 SV=2	0.332696	0.159564
Btbd11	Q6GQW0		Ankyrin repeat and BTB/POZ domain-containing protein BTBD11 OS=Mus musculus GN=Btbd11 PE=2 SV=2	0.333135	-0.231615
Ncdn	Q9Z0E0		Neurochondrin OS=Mus musculus GN=Ncdn PE=1 SV=1	0.340661	0.397052
Ncdn	Q9Z0E0	2	Isoform 2 of Neurochondrin OS=Mus musculus GN=Ncdn	0.340661	0.397052
Ank2	Q8C8R3	2	Isoform 2 of Ankyrin-2 OS=Mus musculus GN=Ank2	0.341481	0.244131
Dlgap1	Q9D415	6	Isoform 6 of Disks large-associated protein 1 OS=Mus musculus GN=Dlgap1	0.343941	0.193092
Prdx2	Q61171		Peroxiredoxin-2 OS=Mus musculus GN=Prdx2 PE=1 SV=3	0.345645	-0.121129
Acat1	Q8QZT1		Acetyl-CoA acetyltransferase, mitochondrial OS=Mus musculus GN=Acat1 PE=1 SV=1	0.34573	-0.22157
Ncam1	P13595	3	Isoform 3 of Neural cell adhesion molecule 1 OS=Mus musculus GN=Ncam1	0.347109	-0.215312
Gria2	P23819	2	Isoform 2 of Glutamate receptor 2 OS=Mus musculus GN=Gria2	0.349191	-0.238379
Gria2	P23819		Glutamate receptor 2 OS=Mus musculus GN=Gria2 PE=1 SV=3	0.349191	-0.238379
Arpc4	P59999		Actin-related protein 2/3 complex subunit 4 OS=Mus musculus GN=Arpc4 PE=1 SV=3	0.350919	-0.42035
Tubb6	Q922F4		Tubulin beta-6 chain OS=Mus musculus GN=Tubb6 PE=1 SV=1	0.352472	-0.394631
Anks1b	Q8BIZ1	2	Isoform 2 of Ankyrin repeat and sterile alpha motif domain-containing protein 1B OS=Mus musculus GN=Anks1b	0.353703	0.173296
Anks1b	Q8BIZ1	4	Isoform 4 of Ankyrin repeat and sterile alpha motif domain-containing protein 1B OS=Mus musculus GN=Anks1b	0.353703	0.173296
Necap1	Q9CR95		Adaptin ear-binding coat-associated protein 1 OS=Mus musculus GN=Necap1 PE=1 SV=2	0.354046	-0.177253
Ywhaz	P63101		14-3-3 protein zeta/delta OS=Mus musculus GN=Ywhaz PE=1 SV=1	0.354177	-0.168056
Krt42	Q6IFX2		Keratin, type I cytoskeletal 42 OS=Mus musculus GN=Krt42 PE=1 SV=1	0.354735	-0.359546
Rbmx	Q9WV02	2	Isoform 2 of RNA-binding motif protein, X chromosome OS=Mus musculus GN=Rbmx	0.35631	-0.499111
Rbmx	Q9WV02		RNA-binding motif protein, X chromosome OS=Mus musculus GN=Rbmx PE=1 SV=1	0.35631	-0.499111
Rbmxl1	Q91VM5		RNA binding motif protein, X-linked-like-1 OS=Mus musculus GN=Rbmxl1 PE=1 SV=1	0.35631	-0.499111
Atp2b1	G5E829		Plasma membrane calcium-transporting ATPase 1 OS=Mus musculus GN=Atp2b1 PE=1 SV=1	0.359213	0.201433
Plppr4	Q7TME0		Phospholipid phosphatase-related protein type 4 OS=Mus musculus GN=Plppr4 PE=1 SV=2	0.361212	0.190493
Tubb3	Q9ERD7		Tubulin beta-3 chain OS=Mus musculus GN=Tubb3 PE=1 SV=1	0.364728	-0.790479
Cfl2	P45591		Cofilin-2 OS=Mus musculus GN=Cfl2 PE=1 SV=1	0.36512	0.419708
Rps27a	P62983		Ubiquitin-40S ribosomal protein S27a OS=Mus musculus GN=Rps27a PE=1 SV=2	0.36712	0.234734
Uba52	P62984		Ubiquitin-60S ribosomal protein L40 OS=Mus musculus GN=Uba52 PE=1 SV=2	0.36712	0.234734
Ubb	P0CG49		Polyubiquitin-B OS=Mus musculus GN=Ubb PE=2 SV=1	0.36712	0.234734
Ubc	P0CG50		Polyubiquitin-C OS=Mus musculus GN=Ubc PE=1 SV=2	0.36712	0.234734
Gnai1	B2RSH2		Guanine nucleotide-binding protein G(i) subunit alpha-1 OS=Mus musculus GN=Gnai1 PE=1 SV=1	0.376844	-0.240882
Krt20	Q9D312		Keratin, type I cytoskeletal 20 OS=Mus musculus GN=Krt20 PE=1 SV=1	0.38162	-0.302591
Kif5c	P28738		Kinesin heavy chain isoform 5C OS=Mus musculus GN=Kif5c PE=1 SV=3	0.39079	0.148311
Krt2	Q3TTY5		Keratin, type II cytoskeletal 2 epidermal OS=Mus musculus GN=Krt2 PE=1 SV=1	0.393171	0.323777
Dlg4	Q62108	3	Isoform 3 of Disks large homolog 4 OS=Mus musculus GN=Dlg4	0.399955	-0.135936
Dlg4	Q62108		Disks large homolog 4 OS=Mus musculus GN=Dlg4 PE=1 SV=1	0.399955	-0.135936
Dlg4	Q62108	2	Isoform 2 of Disks large homolog 4 OS=Mus musculus GN=Dlg4	0.400962	-0.134707
Ldha	P06151		L-lactate dehydrogenase A chain OS=Mus musculus GN=Ldha PE=1 SV=3	0.402133	-0.125097
Pdha1	P35486		Pyruvate dehydrogenase E1 component subunit alpha, somatic form, mitochondrial OS=Mus musculus GN=Pdha1 PE=1 SV=1	0.403778	-0.22905
Dpysl4	O35098	2	Isoform 2 of Dihydropyrimidinase-related protein 4 OS=Mus musculus GN=Dpysl4	0.411984	-0.334876
Dpysl4	O35098		Dihydropyrimidinase-related protein 4 OS=Mus musculus GN=Dpysl4 PE=1 SV=1	0.411984	-0.334876
Krt4	P07744		Keratin, type II cytoskeletal 4 OS=Mus musculus GN=Krt4 PE=1 SV=2	0.413282	-2.0352
Myh11	O08638		Myosin-11 OS=Mus musculus GN=Myh11 PE=1 SV=1	0.413479	-0.306193
Myh11	O08638	2	Isoform 2 of Myosin-11 OS=Mus musculus GN=Myh11	0.413479	-0.306193
Gnao1	P18872	2	Isoform Alpha-2 of Guanine nucleotide-binding protein G(o) subunit alpha OS=Mus musculus GN=Gnao1	0.41413	0.136628
Gnao1	P18872		Guanine nucleotide-binding protein G(o) subunit alpha OS=Mus musculus GN=Gnao1 PE=1 SV=3	0.41413	0.136628
Prdx1	P35700		Peroxiredoxin-1 OS=Mus musculus GN=Prdx1 PE=1 SV=1	0.415544	-0.11087
Epb41l3	Q9WV92	4	Isoform 4 of Band 4.1-like protein 3 OS=Mus musculus GN=Epb41l3	0.425634	0.151608
Epb41l3	Q9WV92		Band 4.1-like protein 3 OS=Mus musculus GN=Epb41l3 PE=1 SV=1	0.425634	0.151608
Epb41l3	Q9WV92	7	Isoform 7 of Band 4.1-like protein 3 OS=Mus musculus GN=Epb41l3	0.425634	0.151608
Epb41l3	Q9WV92	6	Isoform 6 of Band 4.1-like protein 3 OS=Mus musculus GN=Epb41l3	0.425634	0.151608
Epb41l3	Q9WV92	2	Isoform 2 of Band 4.1-like protein 3 OS=Mus musculus GN=Epb41l3	0.425634	0.151608
Epb41l3	Q9WV92	3	Isoform 3 of Band 4.1-like protein 3 OS=Mus musculus GN=Epb41l3	0.425634	0.151608
Epb41l3	Q9WV92	8	Isoform 8 of Band 4.1-like protein 3 OS=Mus musculus GN=Epb41l3	0.425634	0.151608
Epb41l3	Q9WV92	5	Isoform 5 of Band 4.1-like protein 3 OS=Mus musculus GN=Epb41l3	0.425634	0.151608
Krt14	Q61781		Keratin, type I cytoskeletal 14 OS=Mus musculus GN=Krt14 PE=1 SV=2	0.432761	0.287527
Grin2c	Q01098		Glutamate receptor ionotropic, NMDA 2C OS=Mus musculus GN=Grin2c PE=1 SV=2	0.433783	0.179732
Krt79	Q8VED5		Keratin, type II cytoskeletal 79 OS=Mus musculus GN=Krt79 PE=1 SV=2	0.438581	0.591216
Slc8a2	Q8K596		Sodium/calcium exchanger 2 OS=Mus musculus GN=Slc8a2 PE=1 SV=1	0.440578	-0.0831911
Slc8a2	Q8K596	2	Isoform 2 of Sodium/calcium exchanger 2 OS=Mus musculus GN=Slc8a2	0.440578	-0.0831911
Camk2b	P28652		Calcium/calmodulin-dependent protein kinase type II subunit beta OS=Mus musculus GN=Camk2b PE=1 SV=2	0.440637	-0.250193
Gapdh	P16858		Glyceraldehyde-3-phosphate dehydrogenase OS=Mus musculus GN=Gapdh PE=1 SV=2	0.445077	0.105993
Gria4	Q9Z2W8		Glutamate receptor 4 OS=Mus musculus GN=Gria4 PE=1 SV=2	0.448431	-0.263299
Cenpv	Q9CXS4		Centromere protein V OS=Mus musculus GN=Cenpv PE=1 SV=2	0.451161	0.532007
Vcp	Q01853		Transitional endoplasmic reticulum ATPase OS=Mus musculus GN=Vcp PE=1 SV=4	0.452481	1.60863
Abr	Q5SSL4	4	Isoform 4 of Active breakpoint cluster region-related protein OS=Mus musculus GN=Abr	0.457749	0.0628914
Abr	Q5SSL4	3	Isoform 3 of Active breakpoint cluster region-related protein OS=Mus musculus GN=Abr	0.457749	0.0628914
Abr	Q5SSL4	2	Isoform 2 of Active breakpoint cluster region-related protein OS=Mus musculus GN=Abr	0.457749	0.0628914
Abr	Q5SSL4		Active breakpoint cluster region-related protein OS=Mus musculus GN=Abr PE=1 SV=1	0.457749	0.0628914
Plec	Q9QXS1	4	Isoform PLEC-1B,2A of Plectin OS=Mus musculus GN=Plec	0.459466	0.385696
Plec	Q9QXS1	12	Isoform PLEC-1E of Plectin OS=Mus musculus GN=Plec	0.459466	0.385696
Plec	Q9QXS1	11	Isoform PLEC-1E,2A of Plectin OS=Mus musculus GN=Plec	0.459466	0.385696
Plec	Q9QXS1	6	Isoform PLEC-0,1C of Plectin OS=Mus musculus GN=Plec	0.459466	0.385696
Plec	Q9QXS1	9	Isoform PLEC-1D,2A of Plectin OS=Mus musculus GN=Plec	0.459466	0.385696
Plec	Q9QXS1		Plectin OS=Mus musculus GN=Plec PE=1 SV=3	0.459466	0.385696
Plec	Q9QXS1	3	Isoform PLEC-1A of Plectin OS=Mus musculus GN=Plec	0.459466	0.385696
Plec	Q9QXS1	15	Isoform PLEC-1H of Plectin OS=Mus musculus GN=Plec	0.459466	0.385696
Plec	Q9QXS1	14	Isoform PLEC-1G of Plectin OS=Mus musculus GN=Plec	0.459466	0.385696
Plec	Q9QXS1	5	Isoform PLEC-1B of Plectin OS=Mus musculus GN=Plec	0.459466	0.385696
Plec	Q9QXS1	16	Isoform PLEC-1I of Plectin OS=Mus musculus GN=Plec	0.459466	0.385696
Plec	Q9QXS1	2	Isoform PLEC-1 of Plectin OS=Mus musculus GN=Plec	0.459466	0.385696
Plec	Q9QXS1	13	Isoform PLEC-1F of Plectin OS=Mus musculus GN=Plec	0.459466	0.385696
Plec	Q9QXS1	7	Isoform PLEC-0,1C,2A of Plectin OS=Mus musculus GN=Plec	0.459466	0.385696
Plec	Q9QXS1	8	Isoform PLEC-0,1C,2A,3A of Plectin OS=Mus musculus GN=Plec	0.459466	0.385696
Plec	Q9QXS1	10	Isoform PLEC-1D of Plectin OS=Mus musculus GN=Plec	0.459466	0.385696
Capzb	P47757	2	Isoform 2 of F-actin-capping protein subunit beta OS=Mus musculus GN=Capzb	0.460147	-0.418472
Capzb	P47757	4	Isoform 3 of F-actin-capping protein subunit beta OS=Mus musculus GN=Capzb	0.460147	-0.418472
Capzb	P47757		F-actin-capping protein subunit beta OS=Mus musculus GN=Capzb PE=1 SV=3	0.460147	-0.418472
Mfge8	P21956	2	Isoform 2 of Lactadherin OS=Mus musculus GN=Mfge8	0.46226	-0.289398
Mfge8	P21956		Lactadherin OS=Mus musculus GN=Mfge8 PE=1 SV=3	0.46226	-0.289398
Slc25a31	Q3V132		ADP/ATP translocase 4 OS=Mus musculus GN=Slc25a31 PE=1 SV=1	0.474322	0.123425
Hspa1b	P17879		Heat shock 70 kDa protein 1B OS=Mus musculus GN=Hspa1b PE=1 SV=3	0.477395	-0.0684048
Hspa1a	Q61696		Heat shock 70 kDa protein 1A OS=Mus musculus GN=Hspa1a PE=1 SV=2	0.477395	-0.0684048
Cfl1	P18760		Cofilin-1 OS=Mus musculus GN=Cfl1 PE=1 SV=3	0.480805	0.337465
Slc25a22	Q9D6M3		Mitochondrial glutamate carrier 1 OS=Mus musculus GN=Slc25a22 PE=1 SV=1	0.492952	0.1697
Aldoa	P05064		Fructose-bisphosphate aldolase A OS=Mus musculus GN=Aldoa PE=1 SV=2	0.498402	-0.219079
Fasn	P19096		Fatty acid synthase OS=Mus musculus GN=Fasn PE=1 SV=2	0.500107	0.177804
Slc1a2	P43006	2	Isoform Glt-1A of Excitatory amino acid transporter 2 OS=Mus musculus GN=Slc1a2	0.503016	0.125091
Slc1a2	P43006		Excitatory amino acid transporter 2 OS=Mus musculus GN=Slc1a2 PE=1 SV=1	0.503016	0.125091
Map1b	P14873		Microtubule-associated protein 1B OS=Mus musculus GN=Map1b PE=1 SV=2	0.509243	0.272125
Ptprs	B0V2N1	2	Isoform 2 of Receptor-type tyrosine-protein phosphatase S OS=Mus musculus GN=Ptprs	0.51618	-0.211546
Ptprs	B0V2N1		Receptor-type tyrosine-protein phosphatase S OS=Mus musculus GN=Ptprs PE=1 SV=1	0.51618	-0.211546
Ptprs	B0V2N1	3	Isoform 3 of Receptor-type tyrosine-protein phosphatase S OS=Mus musculus GN=Ptprs	0.51618	-0.211546
Ptprs	B0V2N1	6	Isoform 6 of Receptor-type tyrosine-protein phosphatase S OS=Mus musculus GN=Ptprs	0.51618	-0.211546
Ptprs	B0V2N1	4	Isoform 4 of Receptor-type tyrosine-protein phosphatase S OS=Mus musculus GN=Ptprs	0.51618	-0.211546
Ptprs	B0V2N1	5	Isoform 5 of Receptor-type tyrosine-protein phosphatase S OS=Mus musculus GN=Ptprs	0.51618	-0.211546
Tuba3a	P05214		Tubulin alpha-3 chain OS=Mus musculus GN=Tuba3a PE=1 SV=1	0.518087	-0.362604
Hspa1l	P16627		Heat shock 70 kDa protein 1-like OS=Mus musculus GN=Hspa1l PE=1 SV=4	0.519039	-0.0625845
Fbxo6	Q9QZN4		F-box only protein 6 OS=Mus musculus GN=Fbxo6 PE=1 SV=1	0.5194	0.124615
Rps18	P62270		40S ribosomal protein S18 OS=Mus musculus GN=Rps18 PE=1 SV=3	0.519577	0.575433
Krt17	Q9QWL7		Keratin, type I cytoskeletal 17 OS=Mus musculus GN=Krt17 PE=1 SV=3	0.525867	0.299076
Krt19	P19001		Keratin, type I cytoskeletal 19 OS=Mus musculus GN=Krt19 PE=1 SV=1	0.525896	0.302457
Krt10	P02535	2	Isoform 2 of Keratin, type I cytoskeletal 10 OS=Mus musculus GN=Krt10	0.526018	0.306308
Krt10	P02535		Keratin, type I cytoskeletal 10 OS=Mus musculus GN=Krt10 PE=1 SV=3	0.526018	0.306308
Krt10	P02535	3	Isoform 3 of Keratin, type I cytoskeletal 10 OS=Mus musculus GN=Krt10	0.526018	0.306308
Gnas	Q6R0H7		Guanine nucleotide-binding protein G(s) subunit alpha isoforms XLas OS=Mus musculus GN=Gnas PE=1 SV=1	0.527134	0.280769
Gnas	P63094		Guanine nucleotide-binding protein G(s) subunit alpha isoforms short OS=Mus musculus GN=Gnas PE=1 SV=1	0.527134	0.280769
Gnas	P63094	3	Isoform Gnas-3 of Guanine nucleotide-binding protein G(s) subunit alpha isoforms short OS=Mus musculus GN=Gnas	0.527134	0.280769
Gnas	Q6R0H7	4	Isoform XLas-4 of Guanine nucleotide-binding protein G(s) subunit alpha isoforms XLas OS=Mus musculus GN=Gnas	0.527134	0.280769
Gnas	P63094	2	Isoform Gnas-2 of Guanine nucleotide-binding protein G(s) subunit alpha isoforms short OS=Mus musculus GN=Gnas	0.527134	0.280769
Tuba1c	P68373		Tubulin alpha-1C chain OS=Mus musculus GN=Tuba1c PE=1 SV=1	0.527829	-0.358998
Tuba1a	P68369		Tubulin alpha-1A chain OS=Mus musculus GN=Tuba1a PE=1 SV=1	0.527829	-0.358998
Tuba1b	P05213		Tubulin alpha-1B chain OS=Mus musculus GN=Tuba1b PE=1 SV=2	0.527829	-0.358998
Krt222	Q8CCX5	2	Isoform 2 of Keratin-like protein KRT222 OS=Mus musculus GN=Krt222	0.529557	0.181166
Krt222	Q8CCX5		Keratin-like protein KRT222 OS=Mus musculus GN=Krt222 PE=2 SV=1	0.529557	0.181166
Ildr2	B5TVM2		Immunoglobulin-like domain-containing receptor 2 OS=Mus musculus GN=Ildr2 PE=1 SV=2	0.529983	-0.0938135
Syn1	O88935		Synapsin-1 OS=Mus musculus GN=Syn1 PE=1 SV=2	0.532914	-0.213004
Syn1	O88935	1	Isoform Ib of Synapsin-1 OS=Mus musculus GN=Syn1	0.532914	-0.213004
Krt72	Q6IME9		Keratin, type II cytoskeletal 72 OS=Mus musculus GN=Krt72 PE=3 SV=1	0.532984	0.383319
Dlg3	P70175		Disks large homolog 3 OS=Mus musculus GN=Dlg3 PE=1 SV=1	0.535819	-0.282752
Anxa2	P07356		Annexin A2 OS=Mus musculus GN=Anxa2 PE=1 SV=2	0.536494	0.363122
Eno1	P17182		Alpha-enolase OS=Mus musculus GN=Eno1 PE=1 SV=3	0.546331	0.0996165
Srsf2	Q62093		Serine/arginine-rich splicing factor 2 OS=Mus musculus GN=Srsf2 PE=1 SV=4	0.548165	0.53173
Pgk1	P09411		Phosphoglycerate kinase 1 OS=Mus musculus GN=Pgk1 PE=1 SV=4	0.549205	-0.192425
Sv2a	Q9JIS5		Synaptic vesicle glycoprotein 2A OS=Mus musculus GN=Sv2a PE=1 SV=1	0.551586	-0.134456
Anks1b	Q8BIZ1	5	Isoform 5 of Ankyrin repeat and sterile alpha motif domain-containing protein 1B OS=Mus musculus GN=Anks1b	0.55169	0.115761
Anks1b	Q8BIZ1		Ankyrin repeat and sterile alpha motif domain-containing protein 1B OS=Mus musculus GN=Anks1b PE=1 SV=3	0.55169	0.115761
Mdh2	P08249		Malate dehydrogenase, mitochondrial OS=Mus musculus GN=Mdh2 PE=1 SV=3	0.552391	-0.274381
Immt	Q8CAQ8	3	Isoform 3 of MICOS complex subunit Mic60 OS=Mus musculus GN=Immt	0.555354	-0.122007
Slc25a5	P51881		ADP/ATP translocase 2 OS=Mus musculus GN=Slc25a5 PE=1 SV=3	0.558481	-0.271596
Arc	Q9WV31		Activity-regulated cytoskeleton-associated protein OS=Mus musculus GN=Arc PE=1 SV=1	0.560845	0.121011
Mapk1	P63085		Mitogen-activated protein kinase 1 OS=Mus musculus GN=Mapk1 PE=1 SV=3	0.562419	-0.0809777
Npm1	Q61937		Nucleophosmin OS=Mus musculus GN=Npm1 PE=1 SV=1	0.56426	0.370571
Dlg1	Q811D0	2	Isoform 2 of Disks large homolog 1 OS=Mus musculus GN=Dlg1	0.56493	-0.0874959
Dlg1	Q811D0		Disks large homolog 1 OS=Mus musculus GN=Dlg1 PE=1 SV=1	0.56493	-0.0874959
Dlg1	Q811D0	3	Isoform 3 of Disks large homolog 1 OS=Mus musculus GN=Dlg1	0.56493	-0.0874959
Uqcrc1	Q9CZ13		Cytochrome b-c1 complex subunit 1, mitochondrial OS=Mus musculus GN=Uqcrc1 PE=1 SV=2	0.577221	-0.0827703
Hsp90aa1	P07901		Heat shock protein HSP 90-alpha OS=Mus musculus GN=Hsp90aa1 PE=1 SV=4	0.579379	-0.157196
Hba	P01942		Hemoglobin subunit alpha OS=Mus musculus GN=Hba PE=1 SV=2	0.581852	0.185882
Immt	Q8CAQ8	5	Isoform 5 of MICOS complex subunit Mic60 OS=Mus musculus GN=Immt	0.584282	-0.119957
Immt	Q8CAQ8		MICOS complex subunit Mic60 OS=Mus musculus GN=Immt PE=1 SV=1	0.584282	-0.119957
Immt	Q8CAQ8	2	Isoform 2 of MICOS complex subunit Mic60 OS=Mus musculus GN=Immt	0.584282	-0.119957
Tuba4a	P68368		Tubulin alpha-4A chain OS=Mus musculus GN=Tuba4a PE=1 SV=1	0.587092	-0.299633
Tuba8	Q9JJZ2		Tubulin alpha-8 chain OS=Mus musculus GN=Tuba8 PE=1 SV=1	0.589352	-0.280988
Dsg1a	Q61495		Desmoglein-1-alpha OS=Mus musculus GN=Dsg1a PE=2 SV=2	0.591905	-0.179552
Dsg1b	Q7TSF1		Desmoglein-1-beta OS=Mus musculus GN=Dsg1b PE=1 SV=1	0.591905	-0.179552
Dnajb5	O89114		DnaJ homolog subfamily B member 5 OS=Mus musculus GN=Dnajb5 PE=2 SV=1	0.593645	-0.247213
Ap2b1	Q9DBG3		AP-2 complex subunit beta OS=Mus musculus GN=Ap2b1 PE=1 SV=1	0.602134	-0.0471515
Ap2b1	Q9DBG3	2	Isoform 2 of AP-2 complex subunit beta OS=Mus musculus GN=Ap2b1	0.602134	-0.0471515
H1f0	P10922		Histone H1.0 OS=Mus musculus GN=H1f0 PE=2 SV=4	0.602291	0.273435
Agrn	A2ASQ1	2	Isoform 2 of Agrin OS=Mus musculus GN=Agrn	0.604457	0.339911
Agrn	A2ASQ1		Agrin OS=Mus musculus GN=Agrn PE=1 SV=1	0.604457	0.339911
Agrn	A2ASQ1	3	Isoform 3 of Agrin OS=Mus musculus GN=Agrn	0.604457	0.339911
Tcp1	P11983		T-complex protein 1 subunit alpha OS=Mus musculus GN=Tcp1 PE=1 SV=3	0.607704	-0.237068
Prkce	P16054		Protein kinase C epsilon type OS=Mus musculus GN=Prkce PE=1 SV=1	0.608249	0.290262
Purb	O35295		Transcriptional activator protein Pur-beta OS=Mus musculus GN=Purb PE=1 SV=3	0.611353	0.146951
Cenpv	Q9CXS4	2	Isoform 2 of Centromere protein V OS=Mus musculus GN=Cenpv	0.624489	0.30381
Rhob	P62746		Rho-related GTP-binding protein RhoB OS=Mus musculus GN=Rhob PE=1 SV=1	0.634136	-0.130581
Ywhaq	P68254	2	Isoform 2 of 14-3-3 protein theta OS=Mus musculus GN=Ywhaq	0.636549	0.0954316
Ywhaq	P68254		14-3-3 protein theta OS=Mus musculus GN=Ywhaq PE=1 SV=1	0.636549	0.0954316
Slc25a12	Q8BH59		Calcium-binding mitochondrial carrier protein Aralar1 OS=Mus musculus GN=Slc25a12 PE=1 SV=1	0.638554	0.0809127
Atp4a	Q64436		Potassium-transporting ATPase alpha chain 1 OS=Mus musculus GN=Atp4a PE=1 SV=3	0.638915	-0.12323
Atp5po	Q9DB20		ATP synthase subunit O, mitochondrial OS=Mus musculus GN=Atp5o PE=1 SV=1	0.643099	0.331721
Grin1	P35438		Glutamate receptor ionotropic, NMDA 1 OS=Mus musculus GN=Grin1 PE=1 SV=1	0.643584	0.0919454
Gnai2	P08752		Guanine nucleotide-binding protein G(i) subunit alpha-2 OS=Mus musculus GN=Gnai2 PE=1 SV=5	0.644672	0.169264
Vdac2	Q60930		Voltage-dependent anion-selective channel protein 2 OS=Mus musculus GN=Vdac2 PE=1 SV=2	0.649063	0.0542817
Rab35	Q6PHN9		Ras-related protein Rab-35 OS=Mus musculus GN=Rab35 PE=1 SV=1	0.650931	-0.0980025
Pkp1	P97350		Plakophilin-1 OS=Mus musculus GN=Pkp1 PE=1 SV=1	0.65227	0.254461
Gsk3b	Q9WV60		Glycogen synthase kinase-3 beta OS=Mus musculus GN=Gsk3b PE=1 SV=2	0.655027	0.102391
Eef1a1	P10126		Elongation factor 1-alpha 1 OS=Mus musculus GN=Eef1a1 PE=1 SV=3	0.658238	0.0674342
Hspa9	P38647		Stress-70 protein, mitochondrial OS=Mus musculus GN=Hspa9 PE=1 SV=3	0.661629	-0.184821
Eef1a2	P62631		Elongation factor 1-alpha 2 OS=Mus musculus GN=Eef1a2 PE=1 SV=1	0.662959	0.0677683
Dnm1	P39053	4	Isoform 4 of Dynamin-1 OS=Mus musculus GN=Dnm1	0.663207	-0.0756699
Dnm1	P39053	5	Isoform 5 of Dynamin-1 OS=Mus musculus GN=Dnm1	0.663207	-0.0756699
Dnm1	P39053		Dynamin-1 OS=Mus musculus GN=Dnm1 PE=1 SV=2	0.663207	-0.0756699
Dnm1	P39053	3	Isoform 3 of Dynamin-1 OS=Mus musculus GN=Dnm1	0.663207	-0.0756699
Krt1	P04104		Keratin, type II cytoskeletal 1 OS=Mus musculus GN=Krt1 PE=1 SV=4	0.673713	0.143217
Rab2a	P53994		Ras-related protein Rab-2A OS=Mus musculus GN=Rab2a PE=1 SV=1	0.67952	0.103311
Rab2b	P59279		Ras-related protein Rab-2B OS=Mus musculus GN=Rab2b PE=1 SV=1	0.67952	0.103311
Anks1b	Q8BIZ1	3	Isoform 3 of Ankyrin repeat and sterile alpha motif domain-containing protein 1B OS=Mus musculus GN=Anks1b	0.682021	0.0931016
Acly	Q91V92		ATP-citrate synthase OS=Mus musculus GN=Acly PE=1 SV=1	0.692705	0.145694
Grik5	Q61626		Glutamate receptor ionotropic, kainate 5 OS=Mus musculus GN=Grik5 PE=2 SV=2	0.701484	0.0881728
Dnm1	P39053	6	Isoform 6 of Dynamin-1 OS=Mus musculus GN=Dnm1	0.703562	-0.0653195
Hspa5	P20029		78 kDa glucose-regulated protein OS=Mus musculus GN=Hspa5 PE=1 SV=3	0.704377	-0.0815161
Gfap	P03995		Glial fibrillary acidic protein OS=Mus musculus GN=Gfap PE=1 SV=4	0.707025	0.128055
Nrxn1	Q9CS84		Neurexin-1 OS=Mus musculus GN=Nrxn1 PE=1 SV=3	0.710593	0.0795673
Nrxn1	Q9CS84	5	Isoform 5a of Neurexin-1 OS=Mus musculus GN=Nrxn1	0.710593	0.0795673
Nrxn1	Q9CS84	4	Isoform 4a of Neurexin-1 OS=Mus musculus GN=Nrxn1	0.710593	0.0795673
Nrxn1	Q9CS84	3	Isoform 3a of Neurexin-1 OS=Mus musculus GN=Nrxn1	0.710593	0.0795673
Nrxn1	Q9CS84	2	Isoform 2a of Neurexin-1 OS=Mus musculus GN=Nrxn1	0.710593	0.0795673
Gfap	P03995	2	Isoform 2 of Glial fibrillary acidic protein OS=Mus musculus GN=Gfap	0.712003	0.126104
Gpc1	Q9QZF2		Glypican-1 OS=Mus musculus GN=Gpc1 PE=1 SV=1	0.715765	-0.243693
Krt18	P05784		Keratin, type I cytoskeletal 18 OS=Mus musculus GN=Krt18 PE=1 SV=5	0.72449	-0.127502
Dpysl5	Q9EQF6		Dihydropyrimidinase-related protein 5 OS=Mus musculus GN=Dpysl5 PE=1 SV=1	0.729677	-0.0848485
Ldhb	P16125		L-lactate dehydrogenase B chain OS=Mus musculus GN=Ldhb PE=1 SV=2	0.735005	0.181624
Hist1h1t	Q07133		Histone H1t OS=Mus musculus GN=Hist1h1t PE=1 SV=4	0.745439	0.271785
Cltc	Q68FD5		Clathrin heavy chain 1 OS=Mus musculus GN=Cltc PE=1 SV=3	0.750903	0.0646533
Begain	Q68EF6		Brain-enriched guanylate kinase-associated protein OS=Mus musculus GN=Begain PE=1 SV=2	0.757054	-0.0654363
Rpl23a	P62751		60S ribosomal protein L23a OS=Mus musculus GN=Rpl23a PE=1 SV=1	0.758768	-0.0800215
Hspa8	P63017		Heat shock cognate 71 kDa protein OS=Mus musculus GN=Hspa8 PE=1 SV=1	0.759849	0.0320595
Grin1	P35438	2	Isoform 2 of Glutamate receptor ionotropic, NMDA 1 OS=Mus musculus GN=Grin1	0.7624	0.0602418
Hist1h1e	P43274		Histone H1.4 OS=Mus musculus GN=Hist1h1e PE=1 SV=2	0.781679	0.233773
Arl8a	Q8VEH3		ADP-ribosylation factor-like protein 8A OS=Mus musculus GN=Arl8a PE=1 SV=1	0.783515	0.0845108
Arl8b	Q9CQW2		ADP-ribosylation factor-like protein 8B OS=Mus musculus GN=Arl8b PE=1 SV=1	0.783515	0.0845108
Aars	Q8BGQ7		Alanine--tRNA ligase, cytoplasmic OS=Mus musculus GN=Aars PE=1 SV=1	0.786518	0.0632859
Eef2	P58252		Elongation factor 2 OS=Mus musculus GN=Eef2 PE=1 SV=2	0.79021	0.133737
Vim	P20152		Vimentin OS=Mus musculus GN=Vim PE=1 SV=3	0.790294	0.052602
Myh10	Q61879		Myosin-10 OS=Mus musculus GN=Myh10 PE=1 SV=2	0.792442	-0.0803416
Map6	Q7TSJ2	2	Isoform 2 of Microtubule-associated protein 6 OS=Mus musculus GN=Map6	0.795159	0.032929
Map6	Q7TSJ2		Microtubule-associated protein 6 OS=Mus musculus GN=Map6 PE=1 SV=2	0.795159	0.032929
Ap2a1	P17426	2	Isoform B of AP-2 complex subunit alpha-1 OS=Mus musculus GN=Ap2a1	0.796157	0.0369068
Ap2a1	P17426		AP-2 complex subunit alpha-1 OS=Mus musculus GN=Ap2a1 PE=1 SV=1	0.796157	0.0369068
Krt77	Q6IFZ6		Keratin, type II cytoskeletal 1b OS=Mus musculus GN=Krt77 PE=1 SV=1	0.800422	0.104529
Hk1	P17710	4	Isoform HK1-SC of Hexokinase-1 OS=Mus musculus GN=Hk1	0.80086	-0.0490633
Hk1	P17710	2	Isoform HK1-SB of Hexokinase-1 OS=Mus musculus GN=Hk1	0.80086	-0.0490633
Hk1	P17710		Hexokinase-1 OS=Mus musculus GN=Hk1 PE=1 SV=3	0.80086	-0.0490633
Hk1	P17710	3	Isoform HK1 of Hexokinase-1 OS=Mus musculus GN=Hk1	0.80086	-0.0490633
Pfkm	P47857		ATP-dependent 6-phosphofructokinase, muscle type OS=Mus musculus GN=Pfkm PE=1 SV=3	0.800887	0.0484928
Pfkm	P47857	3	Isoform 3 of ATP-dependent 6-phosphofructokinase, muscle type OS=Mus musculus GN=Pfkm	0.800887	0.0484928
Pfkm	P47857	2	Isoform 2 of ATP-dependent 6-phosphofructokinase, muscle type OS=Mus musculus GN=Pfkm	0.800887	0.0484928
Kif5a	P33175		Kinesin heavy chain isoform 5A OS=Mus musculus GN=Kif5a PE=1 SV=3	0.803743	0.0398777
Kif5b	Q61768		Kinesin-1 heavy chain OS=Mus musculus GN=Kif5b PE=1 SV=3	0.803743	0.0398777
Vmac	Q8BP01		Vimentin-type intermediate filament-associated coiled-coil protein OS=Mus musculus GN=Vmac PE=1 SV=1	0.807974	0.206667
Sptbn1	Q62261		Spectrin beta chain, non-erythrocytic 1 OS=Mus musculus GN=Sptbn1 PE=1 SV=2	0.810589	-0.0532367
Stx1b	P61264		Syntaxin-1B OS=Mus musculus GN=Stx1b PE=1 SV=1	0.815453	0.0472727
Krt74	Q6IFZ9		Keratin, type II cytoskeletal 74 OS=Mus musculus GN=Krt74 PE=3 SV=1	0.815548	0.0964657
Dnm2	P39054	2	Isoform 2 of Dynamin-2 OS=Mus musculus GN=Dnm2	0.820529	-0.0397463
Dnm2	P39054		Dynamin-2 OS=Mus musculus GN=Dnm2 PE=1 SV=2	0.820529	-0.0397463
Epb41l1	Q9Z2H5		Band 4.1-like protein 1 OS=Mus musculus GN=Epb41l1 PE=1 SV=2	0.822019	0.0855361
Dstn	Q9R0P5		Destrin OS=Mus musculus GN=Dstn PE=1 SV=3	0.822744	-0.135641
Fbxo2	Q80UW2		F-box only protein 2 OS=Mus musculus GN=Fbxo2 PE=1 SV=1	0.827241	-0.0827998
Hist1h1c	P15864		Histone H1.2 OS=Mus musculus GN=Hist1h1c PE=1 SV=2	0.83031	0.171962
Atp5f1c	Q91VR2		ATP synthase subunit gamma, mitochondrial OS=Mus musculus GN=Atp5c1 PE=1 SV=1	0.831061	-0.0393582
Gdi2	Q61598	2	Isoform 2 of Rab GDP dissociation inhibitor beta OS=Mus musculus GN=Gdi2	0.833294	0.0309594
Gdi2	Q61598		Rab GDP dissociation inhibitor beta OS=Mus musculus GN=Gdi2 PE=1 SV=1	0.833294	0.0309594
Atp2a2	O55143		Sarcoplasmic/endoplasmic reticulum calcium ATPase 2 OS=Mus musculus GN=Atp2a2 PE=1 SV=2	0.839624	0.0399111
Dlg2	Q91XM9	3	Isoform 3 of Disks large homolog 2 OS=Mus musculus GN=Dlg2	0.840578	-0.0358857
Dlg2	Q91XM9	6	Isoform 6 of Disks large homolog 2 OS=Mus musculus GN=Dlg2	0.840578	-0.0358857
Dlg2	Q91XM9	4	Isoform 4 of Disks large homolog 2 OS=Mus musculus GN=Dlg2	0.840578	-0.0358857
Hsp90ab1	P11499		Heat shock protein HSP 90-beta OS=Mus musculus GN=Hsp90ab1 PE=1 SV=3	0.842995	-0.0582711
Jup	Q02257		Junction plakoglobin OS=Mus musculus GN=Jup PE=1 SV=3	0.851097	-0.0732798
Adgra1	Q8C4G9		Adhesion G protein-coupled receptor A1 OS=Mus musculus GN=Adgra1 PE=2 SV=1	0.851643	0.0227098
Gnb1	P62874		Guanine nucleotide-binding protein G(I)/G(S)/G(T) subunit beta-1 OS=Mus musculus GN=Gnb1 PE=1 SV=3	0.853063	0.0581488
Hspa2	P17156		Heat shock-related 70 kDa protein 2 OS=Mus musculus GN=Hspa2 PE=1 SV=2	0.855483	-0.0396812
Dsg1c	Q7TSF0		Desmoglein-1-gamma OS=Mus musculus GN=Dsg1c PE=1 SV=1	0.874783	0.0796301
Sptan1	P16546	2	Isoform 2 of Spectrin alpha chain, non-erythrocytic 1 OS=Mus musculus GN=Sptan1	0.87718	-0.0439052
Sptan1	P16546		Spectrin alpha chain, non-erythrocytic 1 OS=Mus musculus GN=Sptan1 PE=1 SV=4	0.87718	-0.0439052
Hnrnpu	Q8VEK3	2	Isoform 2 of Heterogeneous nuclear ribonucleoprotein U OS=Mus musculus GN=Hnrnpu	0.878574	0.05044
Hnrnpu	Q8VEK3		Heterogeneous nuclear ribonucleoprotein U OS=Mus musculus GN=Hnrnpu PE=1 SV=1	0.878574	0.05044
Krt84	Q99M73		Keratin, type II cuticular Hb4 OS=Mus musculus GN=Krt84 PE=2 SV=2	0.884065	0.0640763
Arf3	P61205		ADP-ribosylation factor 3 OS=Mus musculus GN=Arf3 PE=2 SV=2	0.888449	-0.109174
Arf1	P84078		ADP-ribosylation factor 1 OS=Mus musculus GN=Arf1 PE=1 SV=2	0.888449	-0.109174
Capza2	P47754		F-actin-capping protein subunit alpha-2 OS=Mus musculus GN=Capza2 PE=1 SV=3	0.888707	0.0445848
Gapdhs	Q64467		Glyceraldehyde-3-phosphate dehydrogenase, testis-specific OS=Mus musculus GN=Gapdhs PE=1 SV=1	0.899226	0.0462854
Tcp1	P11983	2	Isoform 2 of T-complex protein 1 subunit alpha OS=Mus musculus GN=Tcp1	0.901372	-0.0713169
Dlg2	Q91XM9	7	Isoform 7 of Disks large homolog 2 OS=Mus musculus GN=Dlg2	0.902546	-0.0207789
Dlg2	Q91XM9	2	Isoform 2 of Disks large homolog 2 OS=Mus musculus GN=Dlg2	0.9046	-0.0203196
Dlg2	Q91XM9		Disks large homolog 2 OS=Mus musculus GN=Dlg2 PE=1 SV=2	0.9046	-0.0203196
Cnksr2	Q80YA9	2	Isoform 2 of Connector enhancer of kinase suppressor of ras 2 OS=Mus musculus GN=Cnksr2	0.910931	-0.0471222
Cnksr2	Q80YA9		Connector enhancer of kinase suppressor of ras 2 OS=Mus musculus GN=Cnksr2 PE=1 SV=1	0.910931	-0.0471222
Dlg2	Q91XM9	8	Isoform 8 of Disks large homolog 2 OS=Mus musculus GN=Dlg2	0.915258	-0.0179184
Syn1	O88935	3	Isoform 3 of Synapsin-1 OS=Mus musculus GN=Syn1	0.932002	-0.0176989
Pfkp	Q9WUA3		ATP-dependent 6-phosphofructokinase, platelet type OS=Mus musculus GN=Pfkp PE=1 SV=1	0.936243	-0.0227057
Pfkp	Q9WUA3	2	Isoform 2 of ATP-dependent 6-phosphofructokinase, platelet type OS=Mus musculus GN=Pfkp	0.936243	-0.0227057
Pfkl	P12382		ATP-dependent 6-phosphofructokinase, liver type OS=Mus musculus GN=Pfkl PE=1 SV=4	0.936243	-0.0227057
Atp1a2	Q6PIE5		Sodium/potassium-transporting ATPase subunit alpha-2 OS=Mus musculus GN=Atp1a2 PE=1 SV=1	0.938201	-0.0134918
Slc25a4	P48962		ADP/ATP translocase 1 OS=Mus musculus GN=Slc25a4 PE=1 SV=4	0.956214	-0.0120247
Prrt1	O35449		Proline-rich transmembrane protein 1 OS=Mus musculus GN=Prrt1 PE=1 SV=1	0.956937	0.00978529
Rps13	P62301		40S ribosomal protein S13 OS=Mus musculus GN=Rps13 PE=1 SV=2	0.958336	0.0429768
H1-1	P43275		Histone H1.1 OS=Mus musculus GN=Hist1h1a PE=1 SV=2	0.958465	0.02724
Aco2	Q99KI0		Aconitate hydratase, mitochondrial OS=Mus musculus GN=Aco2 PE=1 SV=1	0.961683	0.00867092
Igsf8	Q8R366		Immunoglobulin superfamily member 8 OS=Mus musculus GN=Igsf8 PE=1 SV=2	0.967734	0.00733055
Dlg2	Q91XM9	5	Isoform 5 of Disks large homolog 2 OS=Mus musculus GN=Dlg2	0.976525	0.00452249
Atp2a2	O55143	2	Isoform 2 of Sarcoplasmic/endoplasmic reticulum calcium ATPase 2 OS=Mus musculus GN=Atp2a2	0.98149	0.00432433
Krt5	Q922U2		Keratin, type II cytoskeletal 5 OS=Mus musculus GN=Krt5 PE=1 SV=1	0.983331	0.00777459
Sptbn1	Q62261	2	Isoform 2 of Spectrin beta chain, non-erythrocytic 1 OS=Mus musculus GN=Sptbn1	0.983364	0.00469111
Hist1h1b	P43276		Histone H1.5 OS=Mus musculus GN=Hist1h1b PE=1 SV=2	0.984307	0.0171617
Cs	Q9CZU6		Citrate synthase, mitochondrial OS=Mus musculus GN=Cs PE=1 SV=1	0.984631	-0.00660655
Myo5a	Q99104		Unconventional myosin-Va OS=Mus musculus GN=Myo5a PE=1 SV=2	0.986377	0.00382879
Krt8	P11679		Keratin, type II cytoskeletal 8 OS=Mus musculus GN=Krt8 PE=1 SV=4	0.988387	-0.00609594
Ap3b2	Q9JME5		AP-3 complex subunit beta-2 OS=Mus musculus GN=Ap3b2 PE=1 SV=2	0.991618	-0.00565378
Dsp	E9Q557		Desmoplakin OS=Mus musculus GN=Dsp PE=1 SV=1	0.992749	0.00333366
Hist1h3b	P84228		Histone H3.2 OS=Mus musculus GN=Hist1h3b PE=1 SV=2	0.997758	-0.00171416
H3-3a	P84244		Histone H3.3 OS=Mus musculus GN=H3f3a PE=1 SV=2	0.997758	-0.00171416
H3c1	P68433		Histone H3.1 OS=Mus musculus GN=Hist1h3a PE=1 SV=2	0.997758	-0.00171416
H3f3c	P02301		Histone H3.3C OS=Mus musculus GN=H3f3c PE=3 SV=3	0.997758	-0.00171416
Krt76	Q3UV17		Keratin, type II cytoskeletal 2 oral OS=Mus musculus GN=Krt76 PE=1 SV=1	0.999405	-0.000277199

## Sheet: Filtered_Dlg4 Interactome
Filtered Data- Inlcusion of proteins from curated DLG4 interactome defined by Li et al., 2017
Gene Name	Accession	Isoform	Description	pvalue	Log2 FC
Gpm6a	P35802		Neuronal membrane glycoprotein M6-a OS=Mus musculus GN=Gpm6a PE=1 SV=1	0.00418915	-0.561606
Iqsec2	Q5DU25		IQ motif and SEC7 domain-containing protein 2 OS=Mus musculus GN=Iqsec2 PE=1 SV=3	0.0160522	0.658213
Ywhae	P62259		14-3-3 protein epsilon OS=Mus musculus GN=Ywhae PE=1 SV=1	0.0198666	-0.514973
Shank3	Q4ACU6	2	Isoform 2 of SH3 and multiple ankyrin repeat domains protein 3 OS=Mus musculus GN=Shank3	0.0279396	0.674599
Shank3	Q4ACU6	6	Isoform 5 of SH3 and multiple ankyrin repeat domains protein 3 OS=Mus musculus GN=Shank3	0.029566	0.822065
Dlgap3	Q6PFD5		Disks large-associated protein 3 OS=Mus musculus GN=Dlgap3 PE=1 SV=1	0.0374878	0.628443
Shank3	Q4ACU6		SH3 and multiple ankyrin repeat domains protein 3 OS=Mus musculus GN=Shank3 PE=1 SV=3	0.0394075	0.63829
Shank3	Q4ACU6	3	Isoform 4 of SH3 and multiple ankyrin repeat domains protein 3 OS=Mus musculus GN=Shank3	0.0407194	0.660137
Iqsec1	Q8R0S2		IQ motif and SEC7 domain-containing protein 1 OS=Mus musculus GN=Iqsec1 PE=1 SV=2	0.0432114	0.56393
Iqsec1	Q8R0S2	2	Isoform 2 of IQ motif and SEC7 domain-containing protein 1 OS=Mus musculus GN=Iqsec1	0.0432114	0.56393
Shank3	Q4ACU6	8	Isoform 7 of SH3 and multiple ankyrin repeat domains protein 3 OS=Mus musculus GN=Shank3	0.0435244	0.635383
Shank3	Q4ACU6	9	Isoform 8 of SH3 and multiple ankyrin repeat domains protein 3 OS=Mus musculus GN=Shank3	0.0435244	0.635383
Shank3	Q4ACU6	10	Isoform 9 of SH3 and multiple ankyrin repeat domains protein 3 OS=Mus musculus GN=Shank3	0.0435244	0.635383
Shank3	Q4ACU6	11	Isoform 3 of SH3 and multiple ankyrin repeat domains protein 3 OS=Mus musculus GN=Shank3	0.0435244	0.635383
Shank3	Q4ACU6	7	Isoform 6 of SH3 and multiple ankyrin repeat domains protein 3 OS=Mus musculus GN=Shank3	0.0435244	0.635383
Shank3	Q4ACU6	12	Isoform 10 of SH3 and multiple ankyrin repeat domains protein 3 OS=Mus musculus GN=Shank3	0.0437882	0.63466
Shank1	D3YZU1		SH3 and multiple ankyrin repeat domains protein 1 OS=Mus musculus GN=Shank1 PE=1 SV=1	0.0495807	0.751002
Dlgap4	B1AZP2	2	Isoform 2 of Disks large-associated protein 4 OS=Mus musculus GN=Dlgap4	0.0517948	0.409179
Dlgap4	B1AZP2		Disks large-associated protein 4 OS=Mus musculus GN=Dlgap4 PE=1 SV=1	0.052899	0.40182
Pgam5	Q8BX10		Serine/threonine-protein phosphatase PGAM5, mitochondrial OS=Mus musculus GN=Pgam5 PE=1 SV=1	0.057201	0.681082
Pgam5	Q8BX10	2	Isoform 2 of Serine/threonine-protein phosphatase PGAM5, mitochondrial OS=Mus musculus GN=Pgam5	0.057201	0.681082
Dlgap1	Q9D415		Disks large-associated protein 1 OS=Mus musculus GN=Dlgap1 PE=1 SV=3	0.075018	0.336528
Dlgap1	Q9D415	3	Isoform 3 of Disks large-associated protein 1 OS=Mus musculus GN=Dlgap1	0.075018	0.336528
Shank2	Q80Z38	2	Isoform 2 of SH3 and multiple ankyrin repeat domains protein 2 OS=Mus musculus GN=Shank2	0.077589	0.499772
Shank2	Q80Z38		SH3 and multiple ankyrin repeat domains protein 2 OS=Mus musculus GN=Shank2 PE=1 SV=2	0.077589	0.499772
Shank2	Q80Z38	3	Isoform 3 of SH3 and multiple ankyrin repeat domains protein 2 OS=Mus musculus GN=Shank2	0.077589	0.499772
Syt1	P46096		Synaptotagmin-1 OS=Mus musculus GN=Syt1 PE=1 SV=1	0.0828917	-0.731478
Ablim1	Q8K4G5	3	Isoform 3 of Actin-binding LIM protein 1 OS=Mus musculus GN=Ablim1	0.0928989	0.583093
Ablim1	Q8K4G5	2	Isoform 2 of Actin-binding LIM protein 1 OS=Mus musculus GN=Ablim1	0.0942654	0.584172
Ablim1	Q8K4G5		Actin-binding LIM protein 1 OS=Mus musculus GN=Ablim1 PE=1 SV=1	0.0942654	0.584172
Ablim1	Q8K4G5	4	Isoform 4 of Actin-binding LIM protein 1 OS=Mus musculus GN=Ablim1	0.0942654	0.584172
Cyfip2	Q5SQX6		Cytoplasmic FMR1-interacting protein 2 OS=Mus musculus GN=Cyfip2 PE=1 SV=2	0.100534	1.2431
Baiap2	Q8BKX1		Brain-specific angiogenesis inhibitor 1-associated protein 2 OS=Mus musculus GN=Baiap2 PE=1 SV=2	0.105376	-0.473034
Baiap2	Q8BKX1	4	Isoform 4 of Brain-specific angiogenesis inhibitor 1-associated protein 2 OS=Mus musculus GN=Baiap2	0.105376	-0.473034
Baiap2	Q8BKX1	3	Isoform 3 of Brain-specific angiogenesis inhibitor 1-associated protein 2 OS=Mus musculus GN=Baiap2	0.105376	-0.473034
Baiap2	Q8BKX1	2	Isoform 2 of Brain-specific angiogenesis inhibitor 1-associated protein 2 OS=Mus musculus GN=Baiap2	0.105376	-0.473034
Ablim1	Q8K4G5	5	Isoform 5 of Actin-binding LIM protein 1 OS=Mus musculus GN=Ablim1	0.111419	0.581236
Camk2d	Q6PHZ2	5	Isoform 4 of Calcium/calmodulin-dependent protein kinase type II subunit delta OS=Mus musculus GN=Camk2d	0.121308	-0.343598
Camk2d	Q6PHZ2	4	Isoform 3 of Calcium/calmodulin-dependent protein kinase type II subunit delta OS=Mus musculus GN=Camk2d	0.121308	-0.343598
Camk2d	Q6PHZ2	2	Isoform 2 of Calcium/calmodulin-dependent protein kinase type II subunit delta OS=Mus musculus GN=Camk2d	0.121308	-0.343598
Camk2d	Q6PHZ2		Calcium/calmodulin-dependent protein kinase type II subunit delta OS=Mus musculus GN=Camk2d PE=1 SV=1	0.121308	-0.343598
Nsf	P46460		Vesicle-fusing ATPase OS=Mus musculus GN=Nsf PE=1 SV=2	0.122213	0.208191
Sfxn3	Q91V61	2	Isoform 2 of Sideroflexin-3 OS=Mus musculus GN=Sfxn3	0.13345	-0.31917
Sfxn3	Q91V61		Sideroflexin-3 OS=Mus musculus GN=Sfxn3 PE=1 SV=1	0.13345	-0.31917
Rac1	P63001		Ras-related C3 botulinum toxin substrate 1 OS=Mus musculus GN=Rac1 PE=1 SV=1	0.146648	0.810802
Dlgap2	Q8BJ42	2	Isoform 2 of Disks large-associated protein 2 OS=Mus musculus GN=Dlgap2	0.14759	0.282541
Grin2d	Q03391		Glutamate receptor ionotropic, NMDA 2D OS=Mus musculus GN=Grin2d PE=1 SV=3	0.151788	0.410144
Dlgap2	Q8BJ42		Disks large-associated protein 2 OS=Mus musculus GN=Dlgap2 PE=1 SV=2	0.155441	0.277651
Dlgap4	B1AZP2	3	Isoform 3 of Disks large-associated protein 4 OS=Mus musculus GN=Dlgap4	0.156448	0.337393
Ppp3ca	P63328		Serine/threonine-protein phosphatase 2B catalytic subunit alpha isoform OS=Mus musculus GN=Ppp3ca PE=1 SV=1	0.159546	-0.591804
Ppp3ca	P63328	2	Isoform 2 of Serine/threonine-protein phosphatase 2B catalytic subunit alpha isoform OS=Mus musculus GN=Ppp3ca	0.159546	-0.591804
Park7	Q99LX0		Protein DJ-1 OS=Mus musculus GN=Park7 PE=1 SV=1	0.169584	-0.338836
Syngap1	F6SEU4		Ras/Rap GTPase-activating protein SynGAP OS=Mus musculus GN=Syngap1 PE=1 SV=2	0.175547	-0.483266
Lgi1	Q9JIA1		Leucine-rich glioma-inactivated protein 1 OS=Mus musculus GN=Lgi1 PE=1 SV=1	0.177571	-0.443897
Gria1	P23818		Glutamate receptor 1 OS=Mus musculus GN=Gria1 PE=1 SV=1	0.181727	-0.523617
Fam81a	Q3UXZ6		Protein FAM81A OS=Mus musculus GN=Fam81a PE=1 SV=2	0.205856	-0.135307
Camk2a	P11798		Calcium/calmodulin-dependent protein kinase type II subunit alpha OS=Mus musculus GN=Camk2a PE=1 SV=2	0.209859	-0.289279
Adam22	Q9R1V6	16	Isoform 14 of Disintegrin and metalloproteinase domain-containing protein 22 OS=Mus musculus GN=Adam22	0.214676	-0.582911
Adam22	Q9R1V6	21	Isoform 21 of Disintegrin and metalloproteinase domain-containing protein 22 OS=Mus musculus GN=Adam22	0.214676	-0.582911
Adam22	Q9R1V6	18	Isoform 16 of Disintegrin and metalloproteinase domain-containing protein 22 OS=Mus musculus GN=Adam22	0.214676	-0.582911
Adam22	Q9R1V6	19	Isoform 18 of Disintegrin and metalloproteinase domain-containing protein 22 OS=Mus musculus GN=Adam22	0.215128	-0.582553
Adam22	Q9R1V6	2	Isoform 17 of Disintegrin and metalloproteinase domain-containing protein 22 OS=Mus musculus GN=Adam22	0.215128	-0.582553
Phb2	O35129		Prohibitin-2 OS=Mus musculus GN=Phb2 PE=1 SV=1	0.215303	-0.195799
Adam22	Q9R1V6	9	Isoform 7 of Disintegrin and metalloproteinase domain-containing protein 22 OS=Mus musculus GN=Adam22	0.218135	-0.578381
Adam22	Q9R1V6	1	Isoform 20 of Disintegrin and metalloproteinase domain-containing protein 22 OS=Mus musculus GN=Adam22	0.218135	-0.578381
Adam22	Q9R1V6	20	Isoform 19 of Disintegrin and metalloproteinase domain-containing protein 22 OS=Mus musculus GN=Adam22	0.218135	-0.578381
Prkacb	P68181	3	Isoform 3 of cAMP-dependent protein kinase catalytic subunit beta OS=Mus musculus GN=Prkacb	0.226577	0.257392
Prkacb	P68181	2	Isoform 2 of cAMP-dependent protein kinase catalytic subunit beta OS=Mus musculus GN=Prkacb	0.226577	0.257392
Prkacb	P68181	4	Isoform 4 of cAMP-dependent protein kinase catalytic subunit beta OS=Mus musculus GN=Prkacb	0.226577	0.257392
Prkacb	P68181		cAMP-dependent protein kinase catalytic subunit beta OS=Mus musculus GN=Prkacb PE=1 SV=2	0.226577	0.257392
Adam22	Q9R1V6	6	Isoform 4 of Disintegrin and metalloproteinase domain-containing protein 22 OS=Mus musculus GN=Adam22	0.227048	-0.56034
Adam22	Q9R1V6	7	Isoform 5 of Disintegrin and metalloproteinase domain-containing protein 22 OS=Mus musculus GN=Adam22	0.227048	-0.56034
Adam22	Q9R1V6	4	Isoform 2 of Disintegrin and metalloproteinase domain-containing protein 22 OS=Mus musculus GN=Adam22	0.227048	-0.56034
Adam22	Q9R1V6	10	Isoform 8 of Disintegrin and metalloproteinase domain-containing protein 22 OS=Mus musculus GN=Adam22	0.227048	-0.56034
Adam22	Q9R1V6	5	Isoform 3 of Disintegrin and metalloproteinase domain-containing protein 22 OS=Mus musculus GN=Adam22	0.227048	-0.56034
Adam22	Q9R1V6	17	Isoform 15 of Disintegrin and metalloproteinase domain-containing protein 22 OS=Mus musculus GN=Adam22	0.227048	-0.56034
Adam22	Q9R1V6	14	Isoform 12 of Disintegrin and metalloproteinase domain-containing protein 22 OS=Mus musculus GN=Adam22	0.229189	-0.557799
Adam22	Q9R1V6	11	Isoform 9 of Disintegrin and metalloproteinase domain-containing protein 22 OS=Mus musculus GN=Adam22	0.229189	-0.557799
Adam22	Q9R1V6	13	Isoform 11 of Disintegrin and metalloproteinase domain-containing protein 22 OS=Mus musculus GN=Adam22	0.229544	-0.557274
Adam22	Q9R1V6	12	Isoform 10 of Disintegrin and metalloproteinase domain-containing protein 22 OS=Mus musculus GN=Adam22	0.229544	-0.557274
Adam22	Q9R1V6	15	Isoform 13 of Disintegrin and metalloproteinase domain-containing protein 22 OS=Mus musculus GN=Adam22	0.229544	-0.557274
Adam22	Q9R1V6	8	Isoform 6 of Disintegrin and metalloproteinase domain-containing protein 22 OS=Mus musculus GN=Adam22	0.229544	-0.557274
Adam22	Q9R1V6		Disintegrin and metalloproteinase domain-containing protein 22 OS=Mus musculus GN=Adam22 PE=1 SV=2	0.229544	-0.557274
Grin2a	P35436		Glutamate receptor ionotropic, NMDA 2A OS=Mus musculus GN=Grin2a PE=1 SV=2	0.229584	0.188808
Cacng2	O88602		Voltage-dependent calcium channel gamma-2 subunit OS=Mus musculus GN=Cacng2 PE=1 SV=1	0.262877	-0.417703
Camk2a	P11798	2	Isoform Alpha KAP of Calcium/calmodulin-dependent protein kinase type II subunit alpha OS=Mus musculus GN=Camk2a	0.266605	-0.249816
Dlgap1	Q9D415	5	Isoform 5 of Disks large-associated protein 1 OS=Mus musculus GN=Dlgap1	0.275407	0.208912
Ncam1	P13595		Neural cell adhesion molecule 1 OS=Mus musculus GN=Ncam1 PE=1 SV=3	0.279263	-0.247654
Ncam1	P13595	2	Isoform 2 of Neural cell adhesion molecule 1 OS=Mus musculus GN=Ncam1	0.279263	-0.247654
Gria2	P23819	3	Isoform 3 of Glutamate receptor 2 OS=Mus musculus GN=Gria2	0.300844	-0.279615
Gria2	P23819	4	Isoform 4 of Glutamate receptor 2 OS=Mus musculus GN=Gria2	0.300844	-0.279615
Gria3	Q9Z2W9		Glutamate receptor 3 OS=Mus musculus GN=Gria3 PE=1 SV=2	0.30382	-0.426819
Grin2b	Q01097		Glutamate receptor ionotropic, NMDA 2B OS=Mus musculus GN=Grin2b PE=1 SV=3	0.306478	0.181968
Ywhab	Q9CQV8		14-3-3 protein beta/alpha OS=Mus musculus GN=Ywhab PE=1 SV=3	0.307662	-0.264224
Ywhab	Q9CQV8	2	Isoform Short of 14-3-3 protein beta/alpha OS=Mus musculus GN=Ywhab	0.307662	-0.264224
Gda	Q9R111		Guanine deaminase OS=Mus musculus GN=Gda PE=1 SV=1	0.307778	-1.26898
Tubb2b	Q9CWF2		Tubulin beta-2B chain OS=Mus musculus GN=Tubb2b PE=1 SV=1	0.312738	-0.592822
Ncam1	P13595	4	Isoform 4 of Neural cell adhesion molecule 1 OS=Mus musculus GN=Ncam1	0.318418	-0.306554
Dlgap1	Q9D415	4	Isoform 4 of Disks large-associated protein 1 OS=Mus musculus GN=Dlgap1	0.322287	0.193198
Btbd11	Q6GQW0		Ankyrin repeat and BTB/POZ domain-containing protein BTBD11 OS=Mus musculus GN=Btbd11 PE=2 SV=2	0.333135	-0.231615
Dlgap1	Q9D415	6	Isoform 6 of Disks large-associated protein 1 OS=Mus musculus GN=Dlgap1	0.343941	0.193092
Prdx2	Q61171		Peroxiredoxin-2 OS=Mus musculus GN=Prdx2 PE=1 SV=3	0.345645	-0.121129
Ncam1	P13595	3	Isoform 3 of Neural cell adhesion molecule 1 OS=Mus musculus GN=Ncam1	0.347109	-0.215312
Gria2	P23819	2	Isoform 2 of Glutamate receptor 2 OS=Mus musculus GN=Gria2	0.349191	-0.238379
Gria2	P23819		Glutamate receptor 2 OS=Mus musculus GN=Gria2 PE=1 SV=3	0.349191	-0.238379
Arpc4	P59999		Actin-related protein 2/3 complex subunit 4 OS=Mus musculus GN=Arpc4 PE=1 SV=3	0.350919	-0.42035
Tubb6	Q922F4		Tubulin beta-6 chain OS=Mus musculus GN=Tubb6 PE=1 SV=1	0.352472	-0.394631
Anks1b	Q8BIZ1	2	Isoform 2 of Ankyrin repeat and sterile alpha motif domain-containing protein 1B OS=Mus musculus GN=Anks1b	0.353703	0.173296
Anks1b	Q8BIZ1	4	Isoform 4 of Ankyrin repeat and sterile alpha motif domain-containing protein 1B OS=Mus musculus GN=Anks1b	0.353703	0.173296
Gnai1	B2RSH2		Guanine nucleotide-binding protein G(i) subunit alpha-1 OS=Mus musculus GN=Gnai1 PE=1 SV=1	0.376844	-0.240882
Dlg4	Q62108	3	Isoform 3 of Disks large homolog 4 OS=Mus musculus GN=Dlg4	0.399955	-0.135936
Dlg4	Q62108		Disks large homolog 4 OS=Mus musculus GN=Dlg4 PE=1 SV=1	0.399955	-0.135936
Dlg4	Q62108	2	Isoform 2 of Disks large homolog 4 OS=Mus musculus GN=Dlg4	0.400962	-0.134707
Gnao1	P18872	2	Isoform Alpha-2 of Guanine nucleotide-binding protein G(o) subunit alpha OS=Mus musculus GN=Gnao1	0.41413	0.136628
Gnao1	P18872		Guanine nucleotide-binding protein G(o) subunit alpha OS=Mus musculus GN=Gnao1 PE=1 SV=3	0.41413	0.136628
Prdx1	P35700		Peroxiredoxin-1 OS=Mus musculus GN=Prdx1 PE=1 SV=1	0.415544	-0.11087
Camk2b	P28652		Calcium/calmodulin-dependent protein kinase type II subunit beta OS=Mus musculus GN=Camk2b PE=1 SV=2	0.440637	-0.250193
Gria4	Q9Z2W8		Glutamate receptor 4 OS=Mus musculus GN=Gria4 PE=1 SV=2	0.448431	-0.263299
Abr	Q5SSL4	4	Isoform 4 of Active breakpoint cluster region-related protein OS=Mus musculus GN=Abr	0.457749	0.0628914
Abr	Q5SSL4	3	Isoform 3 of Active breakpoint cluster region-related protein OS=Mus musculus GN=Abr	0.457749	0.0628914
Abr	Q5SSL4	2	Isoform 2 of Active breakpoint cluster region-related protein OS=Mus musculus GN=Abr	0.457749	0.0628914
Abr	Q5SSL4		Active breakpoint cluster region-related protein OS=Mus musculus GN=Abr PE=1 SV=1	0.457749	0.0628914
Cfl1	P18760		Cofilin-1 OS=Mus musculus GN=Cfl1 PE=1 SV=3	0.480805	0.337465
Slc1a2	P43006	2	Isoform Glt-1A of Excitatory amino acid transporter 2 OS=Mus musculus GN=Slc1a2	0.503016	0.125091
Slc1a2	P43006		Excitatory amino acid transporter 2 OS=Mus musculus GN=Slc1a2 PE=1 SV=1	0.503016	0.125091
Dlg3	P70175		Disks large homolog 3 OS=Mus musculus GN=Dlg3 PE=1 SV=1	0.535819	-0.282752
Eno1	P17182		Alpha-enolase OS=Mus musculus GN=Eno1 PE=1 SV=3	0.546331	0.0996165
Anks1b	Q8BIZ1	5	Isoform 5 of Ankyrin repeat and sterile alpha motif domain-containing protein 1B OS=Mus musculus GN=Anks1b	0.55169	0.115761
Anks1b	Q8BIZ1		Ankyrin repeat and sterile alpha motif domain-containing protein 1B OS=Mus musculus GN=Anks1b PE=1 SV=3	0.55169	0.115761
Arc	Q9WV31		Activity-regulated cytoskeleton-associated protein OS=Mus musculus GN=Arc PE=1 SV=1	0.560845	0.121011
Mapk1	P63085		Mitogen-activated protein kinase 1 OS=Mus musculus GN=Mapk1 PE=1 SV=3	0.562419	-0.0809777
Dlg1	Q811D0	2	Isoform 2 of Disks large homolog 1 OS=Mus musculus GN=Dlg1	0.56493	-0.0874959
Dlg1	Q811D0		Disks large homolog 1 OS=Mus musculus GN=Dlg1 PE=1 SV=1	0.56493	-0.0874959
Dlg1	Q811D0	3	Isoform 3 of Disks large homolog 1 OS=Mus musculus GN=Dlg1	0.56493	-0.0874959
Grin1	P35438		Glutamate receptor ionotropic, NMDA 1 OS=Mus musculus GN=Grin1 PE=1 SV=1	0.643584	0.0919454
Eef1a1	P10126		Elongation factor 1-alpha 1 OS=Mus musculus GN=Eef1a1 PE=1 SV=3	0.658238	0.0674342
Anks1b	Q8BIZ1	3	Isoform 3 of Ankyrin repeat and sterile alpha motif domain-containing protein 1B OS=Mus musculus GN=Anks1b	0.682021	0.0931016
Grik5	Q61626		Glutamate receptor ionotropic, kainate 5 OS=Mus musculus GN=Grik5 PE=2 SV=2	0.701484	0.0881728
Nrxn1	Q9CS84		Neurexin-1 OS=Mus musculus GN=Nrxn1 PE=1 SV=3	0.710593	0.0795673
Nrxn1	Q9CS84	5	Isoform 5a of Neurexin-1 OS=Mus musculus GN=Nrxn1	0.710593	0.0795673
Nrxn1	Q9CS84	4	Isoform 4a of Neurexin-1 OS=Mus musculus GN=Nrxn1	0.710593	0.0795673
Nrxn1	Q9CS84	3	Isoform 3a of Neurexin-1 OS=Mus musculus GN=Nrxn1	0.710593	0.0795673
Nrxn1	Q9CS84	2	Isoform 2a of Neurexin-1 OS=Mus musculus GN=Nrxn1	0.710593	0.0795673
Cltc	Q68FD5		Clathrin heavy chain 1 OS=Mus musculus GN=Cltc PE=1 SV=3	0.750903	0.0646533
Begain	Q68EF6		Brain-enriched guanylate kinase-associated protein OS=Mus musculus GN=Begain PE=1 SV=2	0.757054	-0.0654363
Grin1	P35438	2	Isoform 2 of Glutamate receptor ionotropic, NMDA 1 OS=Mus musculus GN=Grin1	0.7624	0.0602418
Dstn	Q9R0P5		Destrin OS=Mus musculus GN=Dstn PE=1 SV=3	0.822744	-0.135641
Gdi2	Q61598	2	Isoform 2 of Rab GDP dissociation inhibitor beta OS=Mus musculus GN=Gdi2	0.833294	0.0309594
Gdi2	Q61598		Rab GDP dissociation inhibitor beta OS=Mus musculus GN=Gdi2 PE=1 SV=1	0.833294	0.0309594
Dlg2	Q91XM9	3	Isoform 3 of Disks large homolog 2 OS=Mus musculus GN=Dlg2	0.840578	-0.0358857
Dlg2	Q91XM9	6	Isoform 6 of Disks large homolog 2 OS=Mus musculus GN=Dlg2	0.840578	-0.0358857
Dlg2	Q91XM9	4	Isoform 4 of Disks large homolog 2 OS=Mus musculus GN=Dlg2	0.840578	-0.0358857
Gnb1	P62874		Guanine nucleotide-binding protein G(I)/G(S)/G(T) subunit beta-1 OS=Mus musculus GN=Gnb1 PE=1 SV=3	0.853063	0.0581488
Arf3	P61205		ADP-ribosylation factor 3 OS=Mus musculus GN=Arf3 PE=2 SV=2	0.888449	-0.109174
Capza2	P47754		F-actin-capping protein subunit alpha-2 OS=Mus musculus GN=Capza2 PE=1 SV=3	0.888707	0.0445848
Dlg2	Q91XM9	7	Isoform 7 of Disks large homolog 2 OS=Mus musculus GN=Dlg2	0.902546	-0.0207789
Dlg2	Q91XM9	2	Isoform 2 of Disks large homolog 2 OS=Mus musculus GN=Dlg2	0.9046	-0.0203196
Dlg2	Q91XM9		Disks large homolog 2 OS=Mus musculus GN=Dlg2 PE=1 SV=2	0.9046	-0.0203196
Dlg2	Q91XM9	8	Isoform 8 of Disks large homolog 2 OS=Mus musculus GN=Dlg2	0.915258	-0.0179184
Prrt1	O35449		Proline-rich transmembrane protein 1 OS=Mus musculus GN=Prrt1 PE=1 SV=1	0.956937	0.00978529
Dlg2	Q91XM9	5	Isoform 5 of Disks large homolog 2 OS=Mus musculus GN=Dlg2	0.976525	0.00452249
