# Supplementary material for: Endogenous Syngap1 alpha splice forms promote cognitive function and seizure protection
Source: eLife journal article supplement (doi:10.7554/elife.75707), 2022-04-08

Figure 5 - Supplement

A

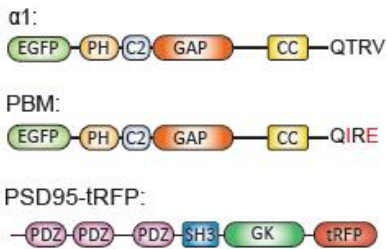

B

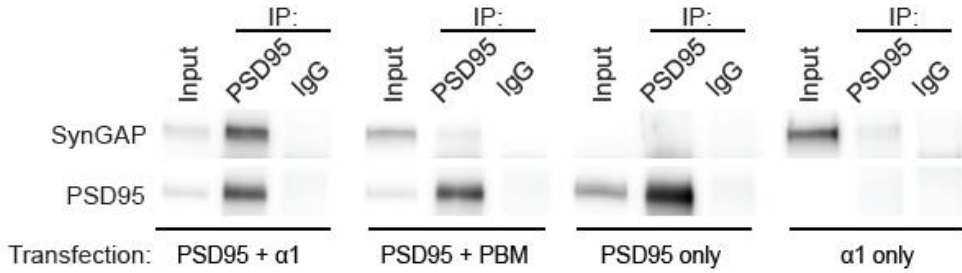

C

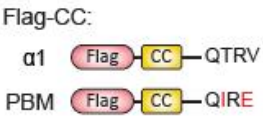

D

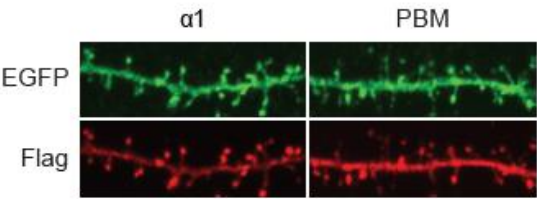

E

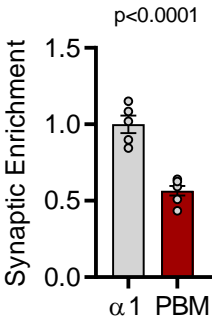

F

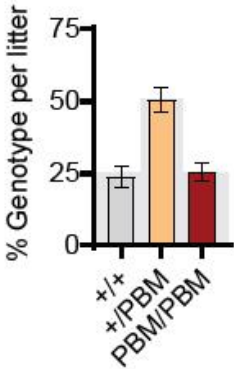

G

**Anti-SynGAPα1 Immunogen:**  
KRLLEDAQRGSFPPWVQQTRV

**PBM Mutant:**  
KRLLEDAQRGSFPPWVQQIRE

H

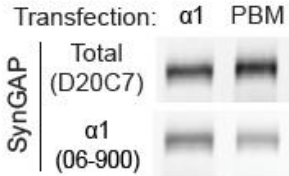

I

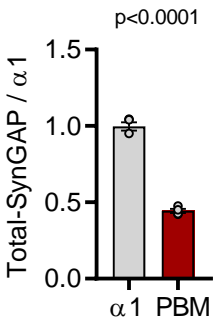

J

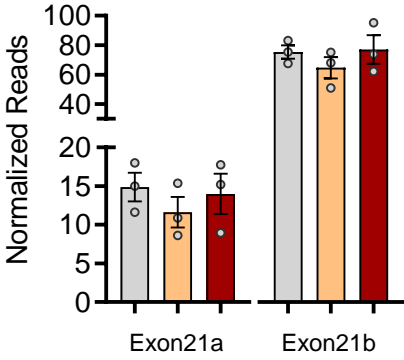

Supplement: supp [file elife-75707-supp-v1.zip]
