# Supplementary material for: Endogenous Syngap1 alpha splice forms promote cognitive function and seizure protection
Source: eLife journal article supplement (doi:10.7554/elife.75707), 2022-04-08

Fig 4 Supplement - source data 6

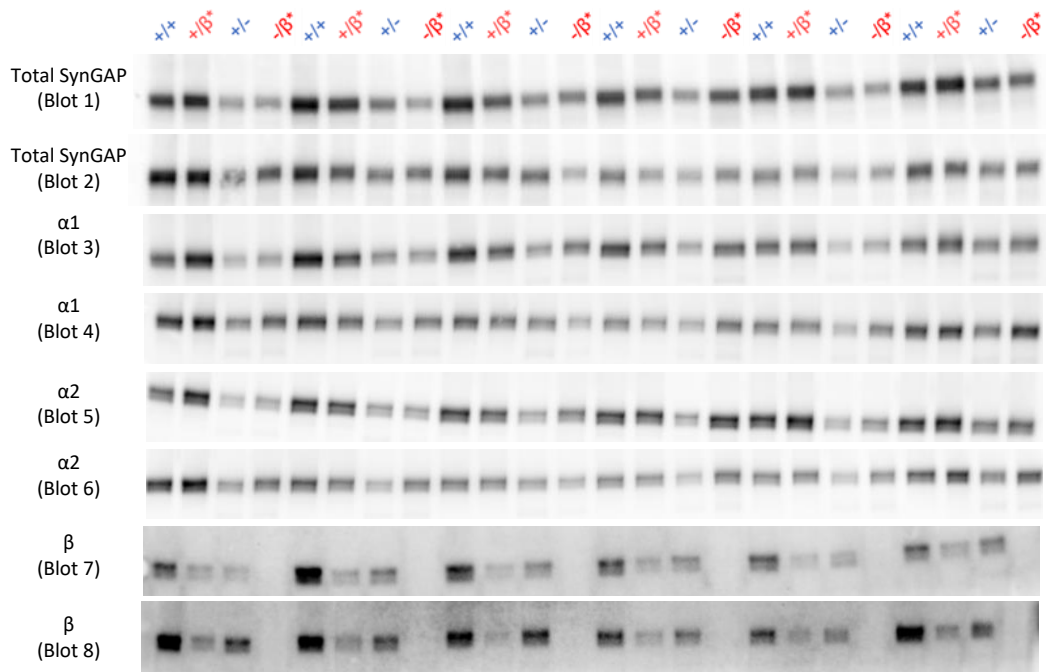

Total Protein (Blot 1)

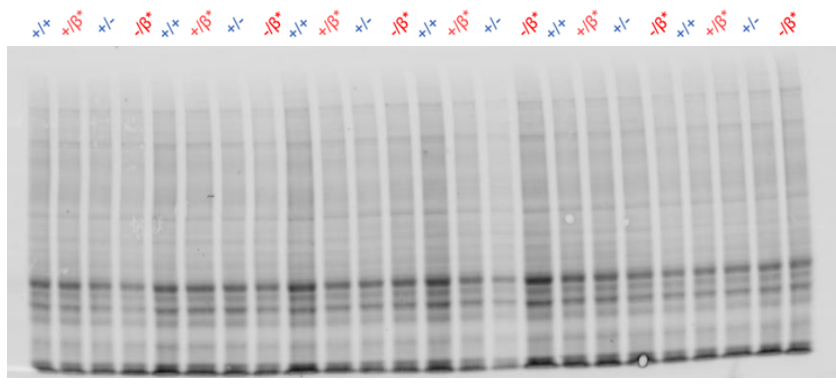

Total Protein (Blot 2)

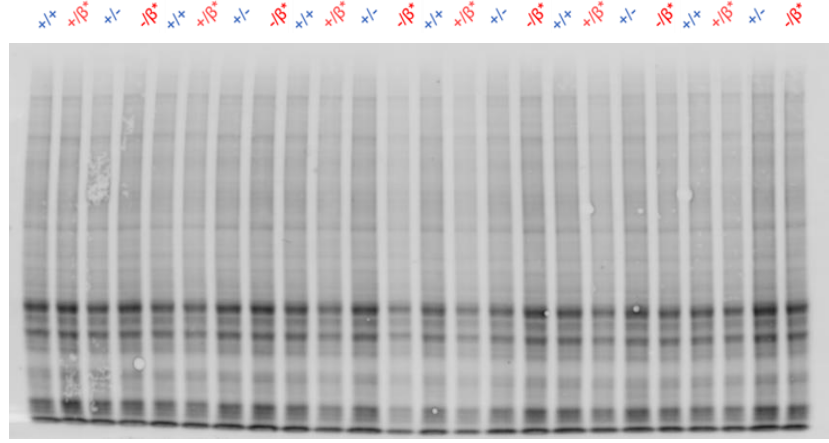

Total Protein (Blot 3)

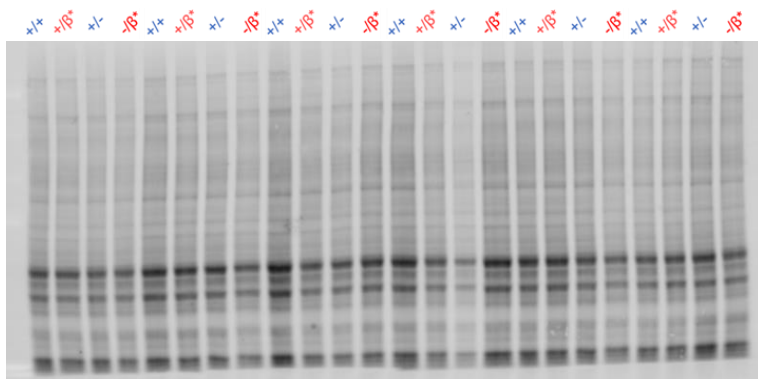

Total Protein (Blot 4)

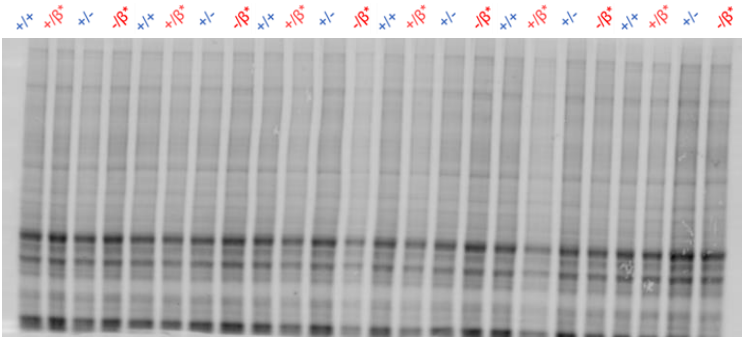

Total Protein (Blot 5)

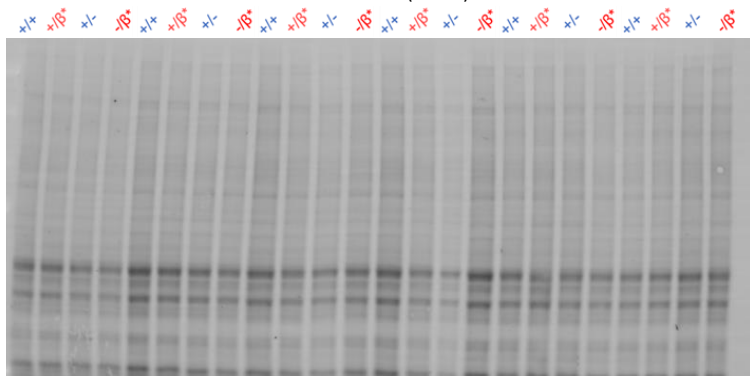

Total Protein (Blot 6)

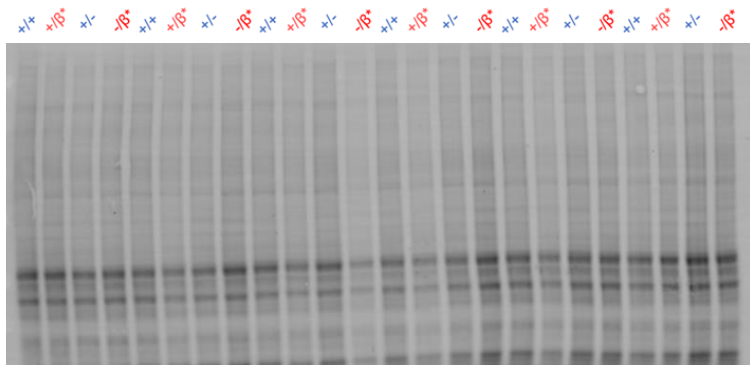

Fig 4 Supplement - source data 6

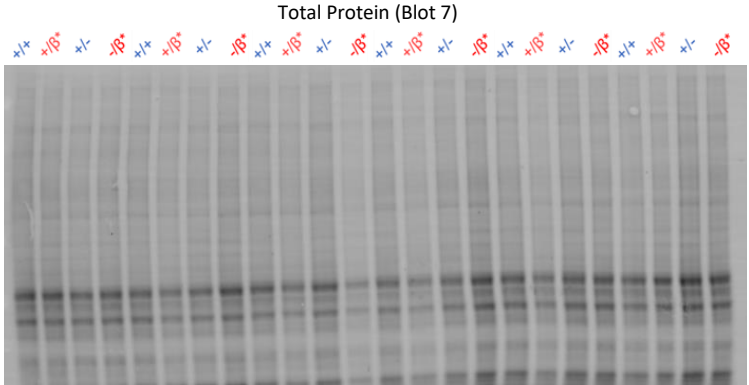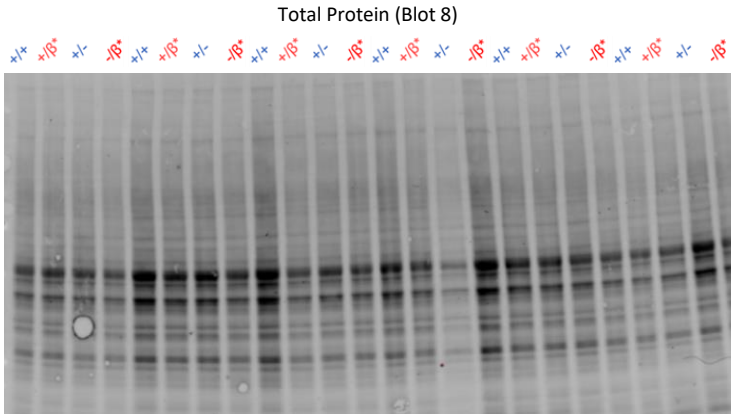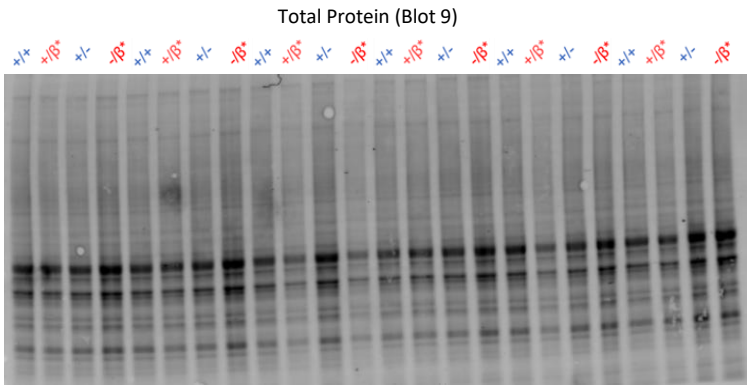

Supplement: supp [file elife-75707-supp-v1.zip]
