# Supplementary material for: Endogenous Syngap1 alpha splice forms promote cognitive function and seizure protection
Source: eLife journal article supplement (doi:10.7554/elife.75707), 2022-04-08

Fig 6 Supplement - source data 10

Panel A

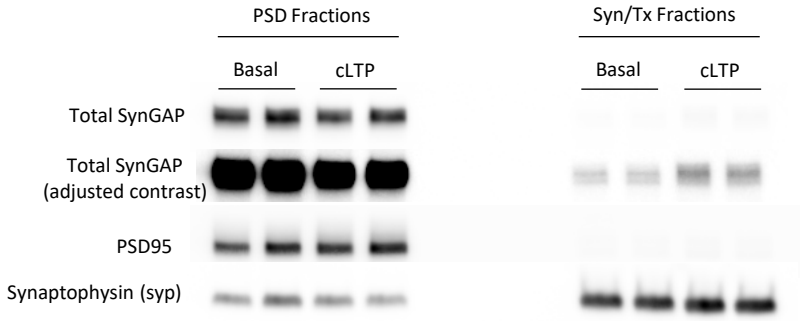

Panel B

Blot 1

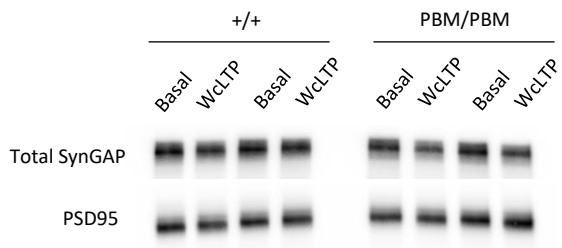

Blot 2

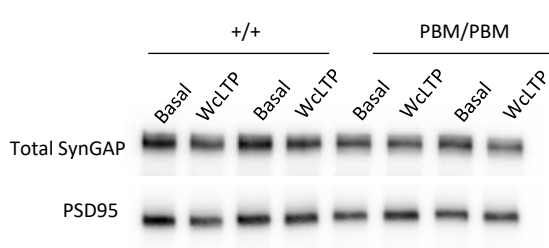

Blot 3

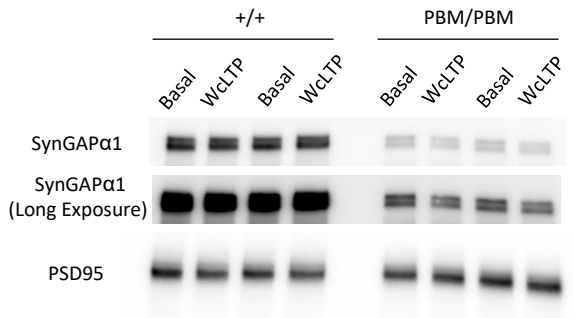

Blot 4

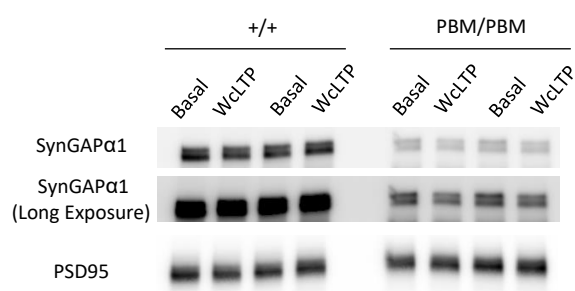

Blot 5

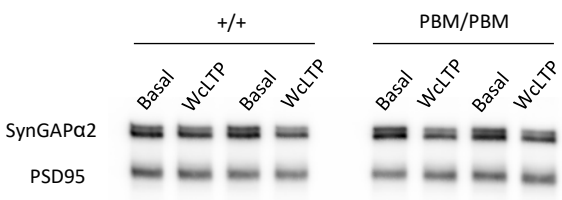

Blot 6

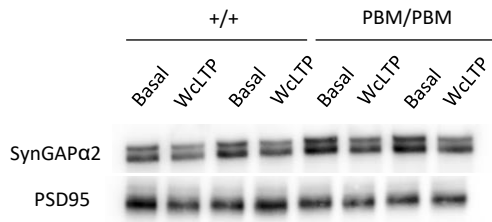

Blot 7

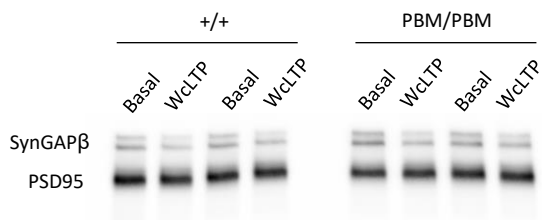

Blot 8

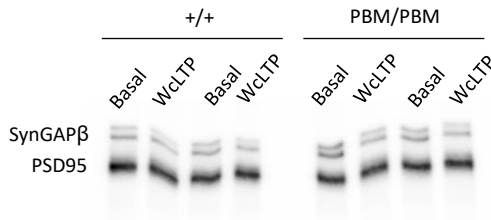

Supplement: supp [file elife-75707-supp-v1.zip]
