# Supplementary material for: Endogenous Syngap1 alpha splice forms promote cognitive function and seizure protection
Source: eLife journal article supplement (doi:10.7554/elife.75707), 2022-04-08

Fig 4 - source data 5

Panel B

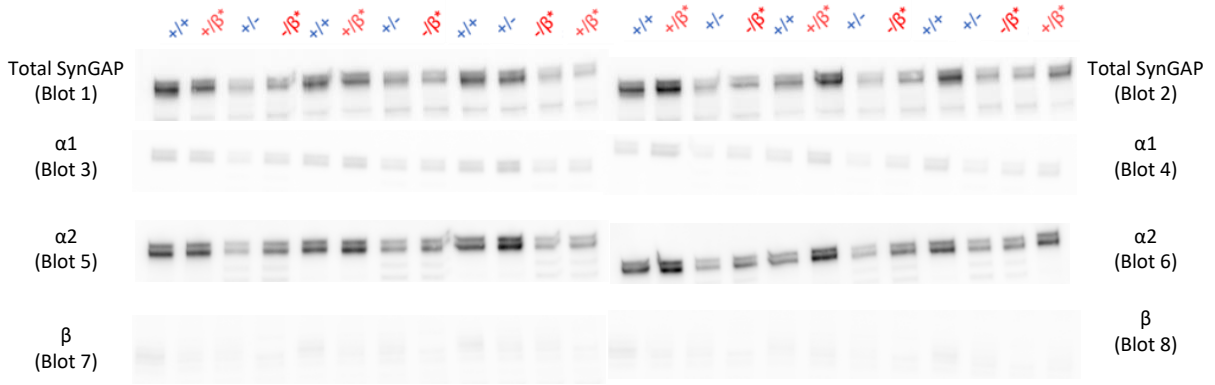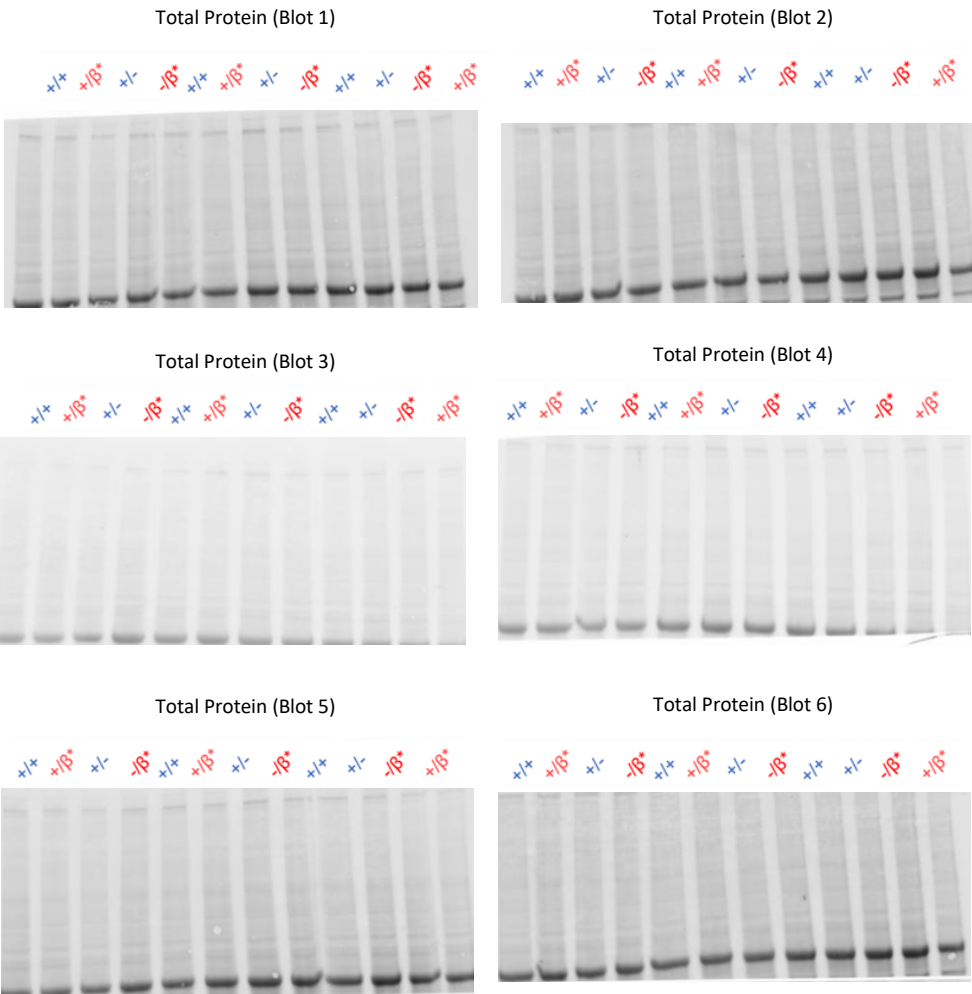

Fig 4 - source data 5

Panel B

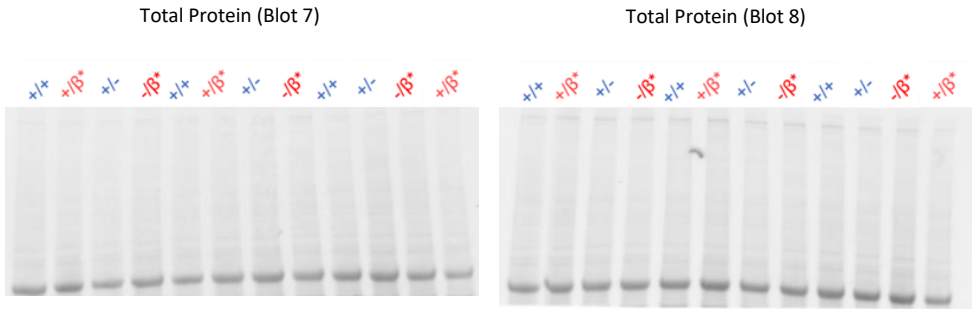

Supplement: supp [file elife-75707-supp-v1.zip]
