# Supplementary figures and images for: Endogenous Syngap1 alpha splice forms promote cognitive function and seizure protection
Source: eLife journal article supplement (doi:10.7554/elife.75707), 2022-04-08

Figure 3 - Supplement

A

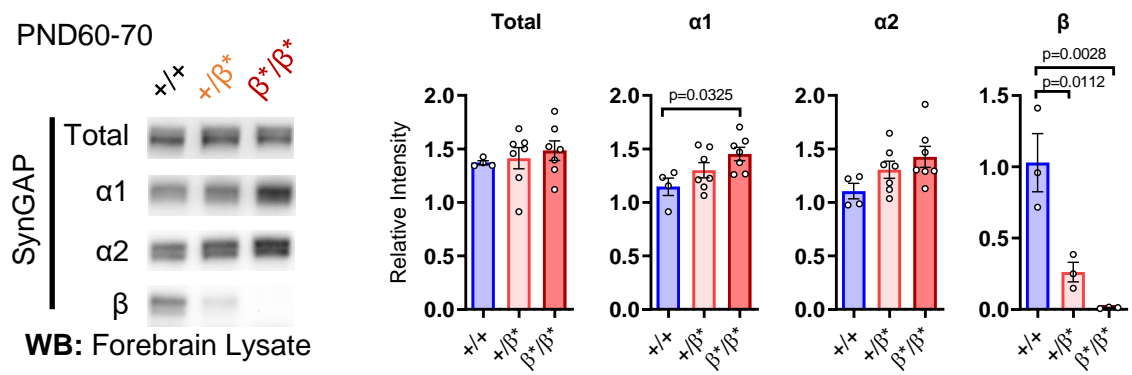

B

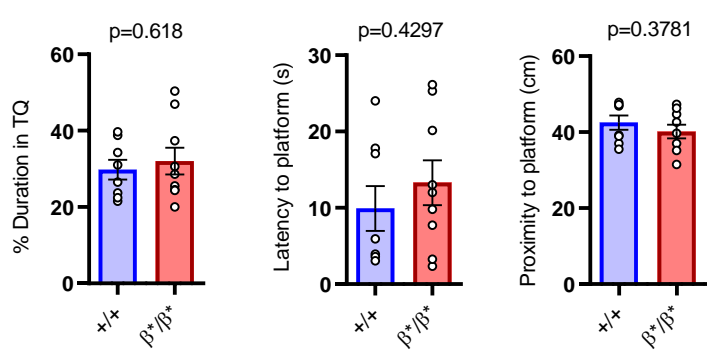

C

| Genotypes at PND30 |             |                   |
|--------------------|-------------|-------------------|
| $+/+$              | $+/\beta^*$ | $\beta^*/\beta^*$ |
| 12 (20%)           | 33 (54%)    | 16 (26%)          |

Supplement: supp [file elife-75707-supp-v1.zip]

Figure 6 - Supplement

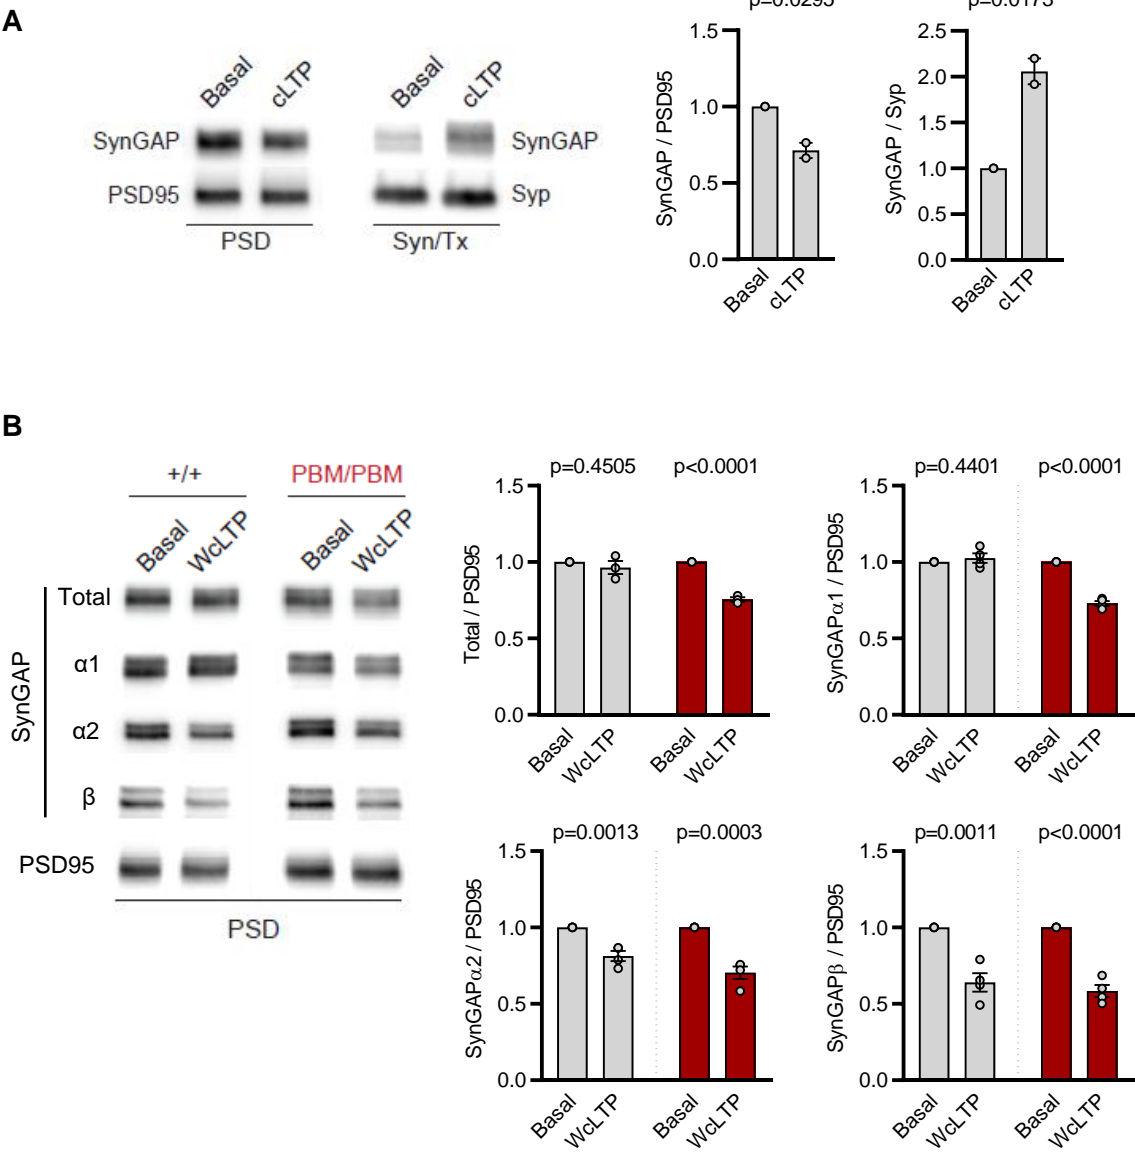

Supplement: supp [file elife-75707-supp-v1.zip]

Figure 4 - Supplement

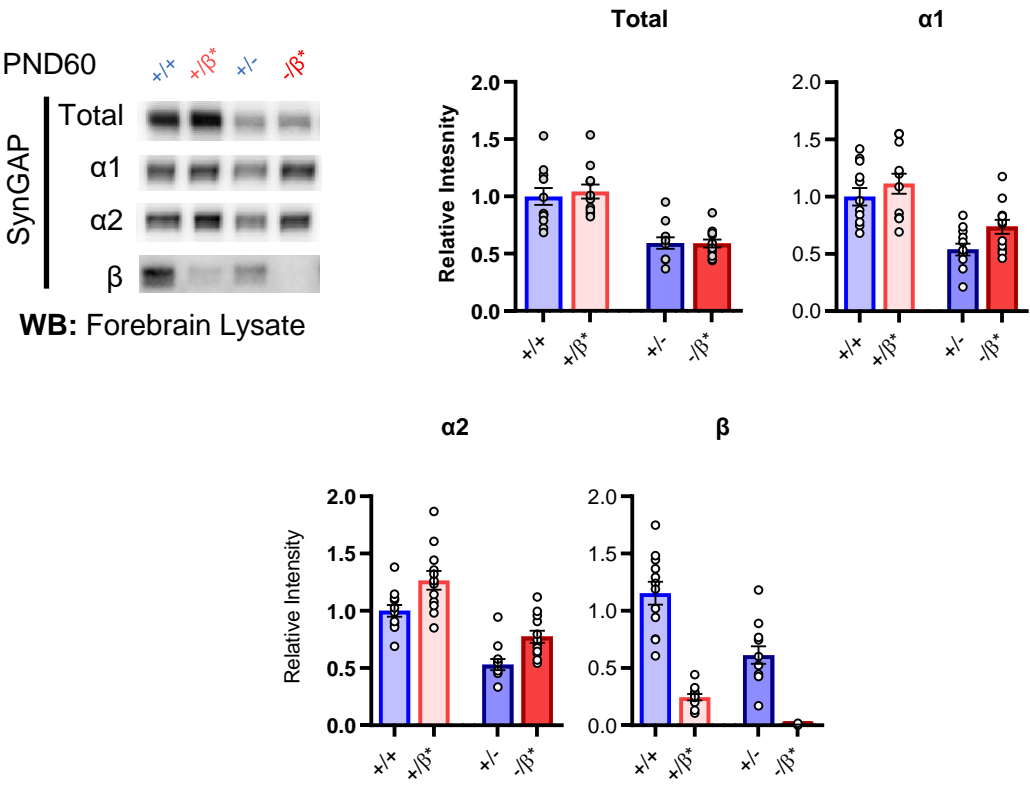

Supplement: supp [file elife-75707-supp-v1.zip]

Figure 2- Supplement

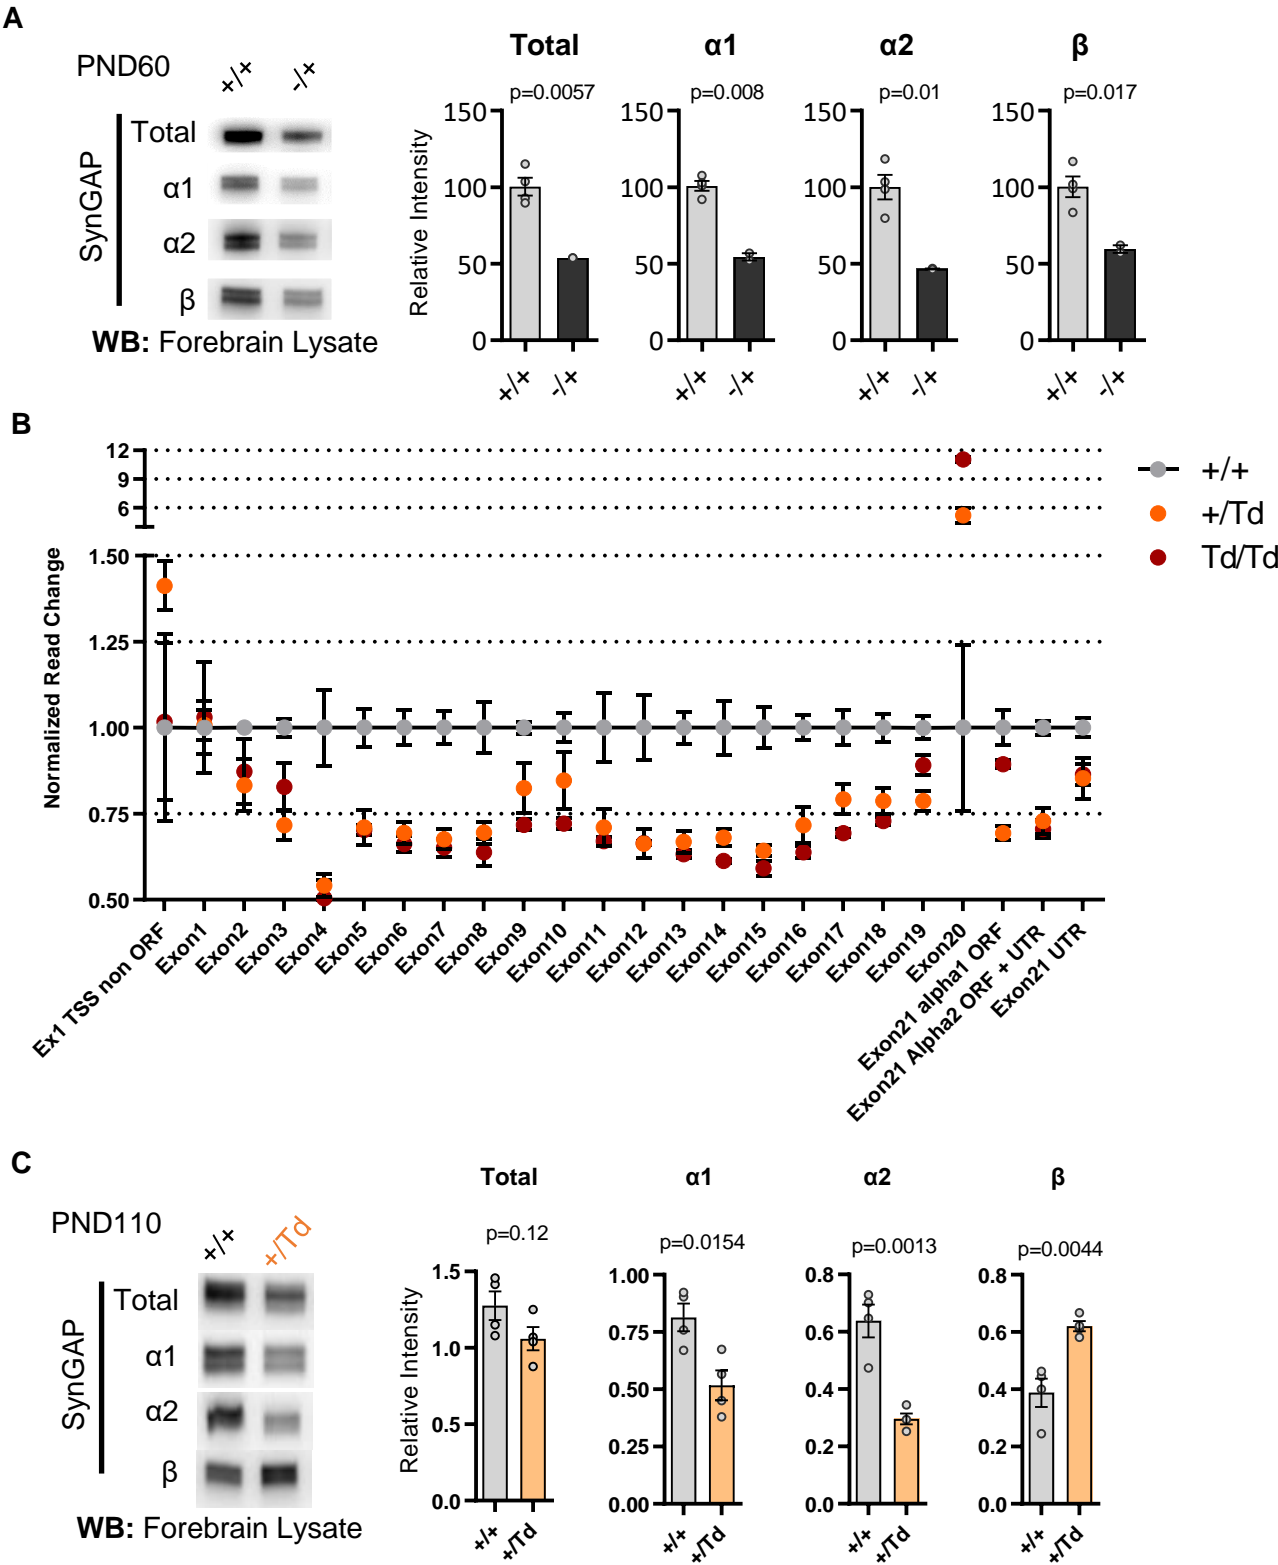

Supplement: supp [file elife-75707-supp-v1.zip]
